23 than the standard set of Fluc(target)/Rluc(control). We demonstrated that FLUX can be used for testing  
24 inhibitors of the NF- $\kappa$ B signaling pathway, validating FLUX applications for various assays in the future.

25

## 26 **INTRODUCTION**

27 High throughput screening technology is important for biomedical research because it can be employed  
28 to find drug candidates against infectious and non-communicable diseases (NCDs). NCDs are chronic diseases  
29 not transmissible between people and have become the world's major killers, accounting for 71% of all deaths  
30 globally (WorldHealthOrganization, 2021). Despite the rapid developments in screening technology which  
31 enable new drugs or active pharmaceutical ingredients to be discovered, such resources are not widely accessible  
32 around the world, and are especially lacking in developing countries due to the high costs. This has resulted in  
33 the majority of low- to middle-income countries (LMIC) to be unable to afford independent drug development  
34 programs, contributing to high numbers of premature deaths, mainly in the South-East Asian, Eastern  
35 Mediterranean and African regions (Martinez et al., 2020). Over 80% of the overall deaths in LMIC regions  
36 are caused by cardiovascular, (lung, esophagus, stomach and liver) cancers, chronic respiratory, congenital birth  
37 defects and digestive diseases (Gelband et al., 2015; Martinez et al., 2020). Therefore, development of effective  
38 and affordable high throughput assays or screening tools would allow researchers with limited funding to access  
39 similar technologies without such a high cost barrier, democratizing and distributing sustainable scientific  
40 development across the globe.

41 Reporter genes are among the common tools used for drug and bioactive compound screening. The  
42 technique can be used for monitoring cellular events associated with signal transduction, gene expression as  
43 well as disease progression (Naylor, 1999; Roda et al., 2004). Reporter genes can generate various signals for  
44 detection including absorbance, fluorescence, and luminescence. Among these detection methods, luminescence  
45 is the most sensitive techniques, providing detection limit as low as  $10^{-18}$  –  $10^{-21}$  moles of analytes. (Díaz-García  
46 & Badía-Lañó, 2019; Roda et al., 2004). Unlike fluorescence detection which requires excitation light that can  
47 create high background, bioluminescence does not require light input, thus eliminating photobleaching and  
48 lowering background signals. Bioluminescence usually generates a broad linear range of detection as well as

49 high sensitivity (Roda et al., 2004; Thorne et al., 2010). It is widely used for monitoring cell progression,  
50 cytotoxicity, gene expression and cellular events relevant to a regulatory element, transcription factors and  
51 activities of bioactive compounds (Fan & Wood, 2007; Nakajima & Ohmiya, 2010; Riss et al., 2005; Thorne et  
52 al., 2010).

53 Bioluminescence is catalyzed by an enzyme class called luciferases, which is present in various  
54 organisms. Different luciferases use different substrates or luciferins with a common use of oxygen to generate  
55 light with specific wavelengths and signals. Current luciferin and luciferase systems include 1. coelenterazine  
56 substrates for *Renilla*, *Gaussia*, and *Oplophorus* luciferases, 2. D-luciferin substrate for firefly and Click beetle  
57 luciferases, 3. flavin-dependent system for bacterial luciferase, 4. cypridina luciferin-based system for  
58 *Cypridina* and *Porichthys* luciferases, 5. tetrapyrrole-based luciferins for luciferases from Dinoflagellates and  
59 Euphausiids 6. 3-hydroxyhispidin-based system for fungal luciferase (Fleiss & Sarkisyan, 2019). The first two  
60 groups of luciferins/luciferases are among the most commonly used systems as gene reporters because their  
61 light signals are high, giving high sensitivity in detection applications. Currently, the D-luciferin and firefly  
62 luciferase (Fluc) is the most widely used system which gives good signals and robustness for its applications.  
63 Although the coelenterazine system is simpler than other systems because it only requires one substrate plus  
64 oxygen, the compound is unstable and can release photons even in the absence of the *Renilla* luciferase (Rluc),  
65 resulting in relatively high background (Wang & El-Deiry, 2003; Zhao et al., 2004). The coelenterazine/*Renilla*  
66 luciferase system is also quite expensive; its price per assay is ~1.4-times that of the D-luciferin/firefly  
67 luciferase. Tetrapyrrole-based system is highly active under acidic conditions, and the substrate is not  
68 commercially available, while the 3-hydroxyhispidin luciferase has just recently been discovered and still  
69 requires further investigation to fully understand its mechanisms. Among all existing luciferase systems, the  
70 flavin-dependent enzyme uses the simplest (thus most economical) substrates in which the price per assay would  
71 be 1/100 of the firefly system. However, its applications as a reporter gene in mammalian cells are limited due  
72 to its low signal. The successful development of the flavin-dependent luciferase as a gene reporter assay in  
73 mammalian cells would contribute to technology enabling high throughput screening tools that are ~100-time  
74 and ~150-time less expensive than the firefly and *Renilla* systems, respectively. In addition, the flavin-

75 dependent luciferase with high bioluminescence signals can also work in complement with firefly luciferase as  
76 a dual reporter system typically used in mammalian cell expression experiments.

77 Bacterial luciferase (Lux) catalyzes bioconversion of reduced flavin, long chain aldehyde and oxygen  
78 to result in oxidized flavin, long chain carboxylic acids and H<sub>2</sub>O with concomitant light production with  
79 maximum emission around 490 nm. The enzyme consists of  $\alpha$  and  $\beta$  subunits which are individually encoded  
80 by the genes *luxA* and *luxB*, respectively in the *lux* operon (Suadee et al., 2007). The *lux* operon also contains  
81 the *luxCDE* genes encoding multi-enzyme fatty acid reductase complex (LuxCDE) that converts fatty acid to  
82 aldehyde to supply the Lux reaction (Meighen, 1991). Several species of luminous bacteria also contain the  
83 *luxG* gene which encodes for a flavin reductase that catalyzes the production of reduced flavin, a substrate for  
84 Lux (Nijvipakul et al., 2008). Reduced flavin is the first substrate to bind to Lux, followed by the oxygen  
85 reaction to generate the C4a-peroxyflavin intermediate which attacks an aldehyde substrate and generates the  
86 following C4a-peroxyhemiacetal intermediate. The cleavage of the O-O bond in C4a-peroxyhemiacetal yields  
87 fatty acid and the excited C4a-hydroxyflavin, which emits the blue-green light with  $\lambda_{\max}$  around 490 nm (Suadee  
88 et al., 2007; Tinikul & Chaiyen, 2014; Tinikul et al., 2020). In the past, several studies have investigated the  
89 expression of Lux in mammalian cells, but most of them only investigated Lux from the terrestrial microbe,  
90 *Photorhabdus luminescens* (*Pl\_Lux*) (Class et al., 2015; Close et al., 2010; Cui et al., 2014; Eldridge et al., 2007;  
91 Gregor et al., 2019; Patterson et al., 2005; Sanseverino et al., 2005; Xu, Close, Webb, Price, et al., 2013; Xu,  
92 Close, Webb, Ripp, et al., 2013; Xu et al., 2015; Xu et al., 2014). The results of these studies showed that  
93 mammalian cells can overexpress *Pl\_Lux*, but their signals are rather low (Close et al., 2010; Cui et al., 2014;  
94 Gregor et al., 2019; Patterson et al., 2005; Tehrani et al., 2014). To the best of our knowledge, none of the  
95 studies has compared the analytical power of *Pl\_Lux* to other commonly used luciferases side-by-side nor  
96 demonstrated that the *Pl\_Lux* can be used in substitution of firefly or *Renilla* luciferases as a gene reporter.

97 We proposed that Lux from *Vibrio campbellii* (*Vc\_Lux*) is another attractive system to be used as a  
98 gene reporter. *Vc\_Lux* is the most thermostable bacterial luciferase reported to date and when expressed in *E.*  
99 *coli*, can generate about 100-fold brighter light than the enzyme from *Vibrio harveyi* (*Vh\_Lux*) (Suadee et al.,  
100 2007; Tinikul & Chaiyen, 2014; Tinikul et al., 2013; Tinikul et al., 2012). As *Vh\_Lux* generates light 5-fold

101 brighter than that of *Pl\_Lux* (Westerlund-Karlsson et al., 2002), it can be assumed that light generated by  
102 *Vc\_Lux* is much brighter than that of *Pl\_Lux*. Although *Vc\_Lux* with two subunits fused *via* a linker can be  
103 overexpressed in mammalian cells, the system previously constructed gives very low bioluminescent signals  
104 (Phonbuppha et al., 2021; Tinikul et al., 2012), making it still impractical for gene reporter applications in  
105 mammalian cell systems.

106 In this work, we improved the expression level of the fusion *Vc\_LuxAB* (*Lux*) by optimizing its codon  
107 usage and modified redox and cell lysis reagents for enzyme assay cocktails. The newly developed Flavin  
108 Luciferase for Mammalian Expression (**FLUX**) showed remarkable performance, yielding >400-times brighter  
109 signals than the system without optimization. These optimizations, for the first time, significantly increased the  
110 bioluminescence signals of the bacterial luciferase to be close to the firefly enzyme (only about 20-fold lower).  
111 Furthermore, the FLUX system has the added advantage of generating much lower background signal than Fluc  
112 or Rluc. We explored the use of FLUX in various cell-lines including HEK293T, NIH3T3, COS1, and HepG2  
113 cells in comparison to Fluc. The results showed that FLUX can be expressed well in all four types of cell-lines  
114 and its signal-to-background ratio is even higher than FLuc in HepG2 cells. As transient transfection of gene  
115 reporters generally requires two different types of light signal generators, one as the target vector for addressing  
116 experimental effects and another as the control vector for evaluating the transfection efficiency, we thus  
117 explored the use of three luciferases (Fluc, Rluc and FLUX) in this combined luciferase-reporter gene assays.  
118 We found that the combined use of FLUX as the target vector and Fluc as the control vector gave the best result.  
119 This combined FLUX/Fluc luciferase-reporter gene assay was investigated for its sensitivity in investigating  
120 the effects of Tumor Necrosis Factor (TNF)-alpha and inhibitors on the NF-κB cell signaling pathway. The  
121 results showed that the FLUX/Fluc reporter system gave similar EC<sub>50</sub> values compared to the use of Fluc/Rluc  
122 as target/control vectors, validating the potential use of FLUX in gene reporter applications. As luciferase  
123 reporter systems are widely used in the biomedical community (In year 2020 alone, more than 22,000  
124 publications used luciferase reporters, (Figure 3-figure supplement 1, pink bars), the 1/100 price reduction of  
125 FLUX would make the system attractive as an alternative gene reporter with significant cost reduction, while  
126 maintaining good capability in high throughput screening applications in the future.

127

## 128 RESULTS

### 129 Optimization of a fusion bacterial luciferase (*lux*) gene expression in mammalian cells

130 We first constructed and optimized a fusion Lux from *Vibrio cambellii* in which both  $\alpha$  and  $\beta$  subunits  
131 are linked *via* an artificial linker obtained from modification of the intergenic sequence linking *luxA* and *luxB*  
132 by adding the nucleotide (G) upstream of the stop codon of *luxA* gene (TAA) and mutating the start codon of  
133 *luxB* from ATG to CAG in order to abolish the stop codon and avoid any internal initiation of translation of  
134 *luxB*. The sequence of the artificial linker is GTAATTAATATTTTCGAAAAGGAAAGAGACCAG, which  
135 encodes for 11 amino acids (VINIFEKERDQ). This allows Lux to be overexpressed mono-cistronically in  
136 mammalian cells (Tinikul et al., 2012). The previously published sequence of the *lux* gene from *Vibrio*  
137 *campbeilli* (*Vc\_lux*) (Tinikul et al., 2012) was analyzed for the Codon Adaptation Index (CAI) using the  
138 GenScript Rara Codon Analysis Tool. The analysis showed that the original *lux* gene has a CAI value of only  
139 0.67. We optimized the codon of the *lux* gene (designated as the *FLUX* gene) to obtain the CAI value of 0.88  
140 (sequence shown in Figure 1-figure supplement 1 and deposited in NCBI database with GenBank number  
141 MZ393808) which should be suitable for expression in mammalian cells as a CAI value of higher than 0.8 is  
142 generally recommended for good gene expression. Expression of the *FLUX* gene using the pGL3 vector under  
143 a constitutive SV40 promoter was investigated in comparison with the original *lux* gene. Each system was also  
144 co-transformed with the pRL-TK vector to normalize transfection efficiency. The results showed that *FLUX*  
145 showed significant improvement in the bioluminescent signals, yielding a  $414 \pm 33$ -fold increase in  
146 bioluminescent signals compared to that of the *lux* (Figure 1A). We further investigated whether this signal  
147 increment was due to higher levels of protein expression using western blot analysis. The western blot results  
148 showed that the protein overproduced by the *FLUX* gene was also significantly higher than that of *lux* gene  
149 (Figure 1B). Our data indicate that with suitable codon usage, the *FLUX* system can generate light reasonably  
150 well in mammalian cells.

151

152

153

154 **Optimization of lysis and assay reagents for maximum light output.**

155 Lysis reagent is a buffer solution used for lysing cells and stabilizing proteins of interest. Ideally, lysis  
156 reagents should be mild, efficient in causing cell lysis and compatible with reagents used in downstream assays.  
157 The main additives in lysis reagents are mainly detergent, protease inhibitors and protein stabilizers in a suitable  
158 buffer (Leibly et al., 2012). Commercially available reagents include Reporter Lysis Buffer (RLB, Promega),  
159 Luciferase Cell Lysis Reagent (CCLR, Promega), Passive Lysis Buffer (PLB, Promega). The first two groups  
160 of lysis reagent are suitable for Fluc, while PLB is a special reagent that can be used for both Fluc and Rluc  
161 (Sherf et al., 1996). In this work, we developed a lysis reagent for the FLUX system based on common reagents  
162 available in the laboratory.

163 We aimed to find suitable reagents including lysis detergent, protease inhibitor and protein stabilizing  
164 agents for the FLUX assays. First, Triton X-100 and CHAPS, which are nonionic and zwitterionic amphipathic  
165 compounds, respectively were used to lyse cells by solubilizing lipids and protein in the membrane and creating  
166 pores within the membrane for full cell lysis. Their effects on FLUX activity were investigated by measuring  
167 the bioluminescent signals of the purified recombinant Lux in various detergent concentrations. The results  
168 showed that Lux activity was susceptible to TritonX-100 because even the lowest TritonX-100 concentration  
169 (0.125 % w/v) resulted in a 10% decrease in activity of Lux, while 0.5 % (w/v) TritonX-100 decreased the  
170 activity by 50 % (Figure 2A). The Lux activity is more stable in the presence of CHAPS, demonstrating stability  
171 in CHAPS concentrations ranging from 0.63 up to 2.5 % (w/v), while 5 % (w/v) CHAPS resulted in a drop in  
172 activity of around 50% (Figure 2B). These results suggest that 1-2 %(w/v) of CHAPS is suitable for lysing the  
173 mammalian cells transfected with the *FLUX* reporter gene. For protease inhibitors, EDTA which is a metal  
174 chelator capable of chelating metal cofactors of several metalloproteases generally produced in mammalian  
175 cells was chosen as a protease inhibitor additive. We investigated the effects of EDTA on FLUX activity by  
176 measuring bioluminescence signals of the purified recombinant Lux in various concentrations of EDTA. The  
177 results showed that EDTA does not affect FLUX activity; the system retained nearly 100% of the  
178 bioluminescence in 0.25 - 5 mM EDTA (Figure 2C).



179 For an additive to stabilize proteins during freeze-thaw processes, we chose to explore the use of  
180 glycerol for this purpose. Because the activity assays usually cannot be performed on the same day as the cell  
181 harvesting and lysis process, cell lysates are generally kept frozen before thawing later for activity measurement.  
182 As glycerol is a common protein stabilizer which can prevent ice crystallization which destroys protein  
183 structures (Dashnau et al., 2006), the effects of glycerol on Lux activity were investigated during freezing-thaw  
184 processes by measuring the bioluminescence signals of Lux before and after three freeze-thaw cycles. The  
185 results showed that glycerol (2.5 to 20 % (w/v)) had no effect on Lux signals because it could retain nearly  
186 100% of the Lux activity over the entire range of glycerol concentrations investigated (Figure 4D, Orange).  
187 However, only 10-20% (w/v) of glycerol allowed retention of ~100% of Lux activity after three freeze-thaw  
188 cycles (Figure 4D, Purple). These results suggest that at least 10 % (w/v) glycerol is suitable for stabilizing the  
189 protein during the freezing-thawing process.

190 A final formula of lysis reagents for the FLUX reporter gene or Lux Lysis Regent (LLR) developed in  
191 this work consists of 1 % (w/v) CHAPS, 1 mM EDTA, 10 % (w/v) glycerol in 50 mM sodium phosphate buffer  
192 pH 7.0 which is typically used in the assay reaction. Thus, we further investigated the efficiency of LLR  
193 compared to a buffer without any additive reagent by monitoring cell morphology on the culture plate before  
194 and after harvesting the cells. Commercial lysis buffers for harvesting adherent cells such as Cell Culture Lysis  
195 Reagent (CCLR, Promega) was also compared to evaluate the efficiency of LLR. Results showed that most of  
196 the adherent cells could be harvested by LLR (Figure 3F, after harvesting), while using a buffer without any  
197 additives resulted in most of the cells remaining adhered to the culture plate (Figure 3E, after harvesting). The  
198 LLR harvesting efficiency is comparable to that of CCLR (Figure 3G, after harvesting), suggesting that LLR is  
199 a suitable lysis buffer to remove and lyse adherent cells.

200 As our data showed that LLR is a suitable lysis reagent to harvest adherent cells and help stabilize the  
201 Lux protein, we further applied LLR for lysing adherent cells expressing FLUX by measuring the FLUX  
202 activity. Previously, LUX activity could be assayed using the reagents consisting of 10  $\mu$ M FMN, 200  $\mu$ M HPA,  
203 200  $\mu$ M NADH, and 20  $\mu$ M decanal in 50 mM sodium phosphate buffer pH 7.0. Typically, 20-50  $\mu$ L of cell  
204 lysate was mixed with 50 mU reductase C<sub>1</sub> before adding the assay cocktail to monitor bioluminescent signals



205 (Tinikul et al., 2012). In this work, we found that when using LLR for cell harvesting and lysis, cell lysate  
206 volume could be reduced by 10-fold, possibly because LLR better lyses adherent cells and stabilizes the Lux  
207 protein (Data not shown). As the cell lysate amount required was reduced, we further optimized the cocktail  
208 assay reagents to minimize the cost, while maintaining high bioluminescent signals. We found that the Lux  
209 assay cocktail consisting of 5  $\mu$ M FMN, 100  $\mu$ M HPA, 100  $\mu$ M NADH, and 10  $\mu$ M decanal in 50 mM sodium  
210 phosphate buffer pH 7.0 provides bioluminescent signals comparable to the previously used Lux cocktail (data  
211 not shown) which contained the same substrates with most at two-fold higher concentrations and thus would be  
212 twice as expensive. Altogether, our results indicate that the optimization of lysis and assay reagents could  
213 maximize bioluminescent output and minimize the FLUX reporter gene's assay cost.

214

#### 215 **Comparison of light generated from FLUX and Fluc.**

216 To evaluate whether the FLUX system can be used as a gene reporter in transient transfection for probing  
217 molecular events in mammalian cells, we carried out experiments to measure light signal to background (S/N)  
218 ratios to compare the sensitivity of FLUX to the Fluc reporter gene, which is broadly used in a wide variety of  
219 applications. Bioluminescence readout signals generally contain target signals and unspecific signals from  
220 background, stray light and detector offset, etc. (Alkemade et al., 1978). Therefore, a S/N ratio, not an absolute  
221 signal value, is generally used as a parameter to represent measurement signals. Generally, signal can be  
222 measured from bioluminescence generated under the control of a constitutive or inducible promoter, while  
223 background can be measured from bioluminescence generated in the absence of any activating element (Paguio  
224 et al., 2005). The S/N value can evaluate the strength of the promoter or measure the potency of  
225 compounds/metabolites under investigation such as inhibitors or inducers of the promoter (Wunsch et al., 2005).  
226 For comparison and benchmarking, we chose two vector systems commonly used for expression of the Fluc  
227 reporter gene, pGL3[*luc+*] and pGL4[*luc2*] vectors (Promega, USA), to construct the expression vector of  
228 FLUX to compare with the bioluminescence signals of Fluc. The pGL4[*luc2*] vector is the newest series of Fluc  
229 reporter genes with a significantly improved signal to background ratio compared to the previous version  
230 pGL3[*luc+*] vector (Paguio et al., 2005). However, the pGL3[*luc+*] vector is still widely used in biological  
231 research, with 5040 published articles in 2020 (Figure 3-figure supplement 1, green bars). Therefore, the *FLUX*

232 gene was inserted into the pGL3 and pGL4 vectors downstream of the constitutive SV40 promoter as well as in  
233 the same position in a vector without SV40 promoter to construct vector sets with and without SV40 (Figure 3-  
234 figure supplement 2). All systems were independently co-transfected with the vector containing Rluc as an  
235 internal control vector in various cell types including HEK293T, NIH3T3, COS1, and HepG2 cells.

236 The results showed that the FLUX system generated less light intensity both in target and background  
237 signals than Fluc in both pGL3[*luc+*] and pGL4 [*luc2*] vectors (Figure 3-figure supplement 3). This is due to  
238 the nature of the low quantum yield of Lux compared to Fluc (Hastings et al., 1965; Niwa et al., 2010). However,  
239 analysis of signal to background ratios (S/N) showed that S/N values of FLUX and Fluc expressed in the pGL3  
240 expression vector are comparable in NIH3T3 and COS1 cells (Figure 3A). S/N values of FLUX are less than  
241 the Fluc in HEK293T cells while they are considerably higher than Fluc in HepG2 cells (Figure 3A). These S/N  
242 ratio behaviors are similar to the experiments comparing the FLUX and Fluc expression using the pGL4 vector  
243 (Figure 3B). The higher S/N ratio of FLUX in HepG2 cells than Fluc is caused by the higher background signals  
244 of Fluc than FLUX, whereas the two systems generated comparable target signals (Figure 3-figure supplement  
245 3). The higher background signals in the Fluc system (in both *luc+* and *luc2* genes) might be the result of  
246 anomalous expression of the reporter gene caused by cryptic regular-binding site or/and enhancer element  
247 (Paguio et al., 2005). With the origin of FLUX being from bacteria, such anomaly is less evident in mammalian  
248 systems.

249 These data in Figure 3 clearly suggest that FLUX functioned well as gene reporters in HepG2 and COS1  
250 cells because the S/N values of the FLUX systems were quite high in both cells with both vector types. For the  
251 NIH3T3 cells, the FLUX system also showed higher S/N values than the Fluc system with the pGL4 vector,  
252 also implying that the FLUX system should be able to serve as a gene reporter in NIH3T3 as well. Among all  
253 cell types, the FLUX system gave lower S/N ratio than the Fluc system in HEK293T cells (about 2-folds). Based  
254 on these data in Figure 3 alone, the ability of FLUX to serve as a gene reporter system in HEK293T cells was  
255 questionable. We thus investigated the ability of FLUX to serve as a gene reporter in HEK293T cells in the  
256 following sections. We chose to validate the function of FLUX in HEK293T cells to prove the functions of  
257 FLUX in the least favorable expression systems. If FLUX can be used as a gene reporter in HEK293T, the  
258 results inevitably endorse the use of FLUX in more favorable HepG2, COS1 and NIH3T3 cells.

## 259 **Exploring capability and robustness of the FLUX gene reporter system**

260 To evaluate the use of FLUX system as a gene reporter, we explored the range of linear detection for  
261 FLUX to evaluate the sensitivity and working range of the system, and also investigated parameters that can  
262 affect the transient transfection process including cell growth period and amount of vector used for transfection.

263 First, the sensitivity and linear range of detection by FLUX were investigated by measuring the  
264 bioluminescence signals generated by various amount of the purified Lux. The results showed a broad linearity  
265 range with at least eight orders of detection magnitude; this is equivalent to a broad dynamic range of 0.25  
266 fmoles to 850 fmoles (Figure 4A). These data indicate that bioluminescent signals directly depend on the amount  
267 of Lux over a wide range, also enabling limits of detection down to a few molecules at amole levels ( $10^{-18}$  mole).  
268 The wide range of FLUX detection limit (eight orders of magnitude) is similar to the detection range of Fluc  
269 and is wider than that of Rluc (about seven orders of magnitude) (Sherf et al., 1996). However, Fluc and Rluc  
270 give higher sensitivity than FLUX because their limit of detection (LoD) is lower. The LoDs of Fluc, Rluc and  
271 Lux are 0.01, 0.3 and 25 amoles of enzymes, respectively which correlate with their quantum yields (0.48, 0.05,  
272 and 0.16 for Fluc, Rluc, and Lux, respectively) and their catalytic turnovers ( $1.6\text{ s}^{-1}$ ,  $1.9\text{ s}^{-1}$ , and  $0.005\text{ s}^{-1}$ , for  
273 Fluc, Rluc, and Lux, respectively) (Branchini et al., 1998; Lei et al., 2004; Loening et al., 2006; Matthews et  
274 al., 1977; Niwa et al., 2010; Sherf et al., 1996; Suadee et al., 2007; Sucharitakul et al., 2007). However, it should  
275 be noted that this LoD level was based on the purified enzymes which is not directly relevant to the FLUX  
276 expression in mammalian cells. We later showed that transfection of  $10^5$  cells, a level typically used in biological  
277 research with 20 ng of the FLUX vector can yield good signals for practical experiments (Figure 4-figure  
278 supplement 2 and see more results below).

279 Second, we investigated signals generated by FLUX after transfection. Transfected cells are typically  
280 harvested for analyzing levels of gene expression 24 hours and up to 72 hours post-transfection. A suitable time  
281 for cell harvesting is different, depending on cell type, research goals and specific expression characteristics  
282 (Doyle & Promega, 1996). Therefore, normalized FLUX activities in HEK293T cells transfected with the  
283 pGL3[FLUX/SV40] vector and the pRL-TK vector as an internal control at various time points after transfection  
284 were measured. Results showed that the luciferase activities in cell lysate increased over time (Figure 4B). The

285 FLUX signal at 24-hours post-transfection was significantly higher than the non-transfected cells by at least 3  
286 orders of detection magnitude and was much higher than the background signal (Figure 4-figure supplement 1,  
287 orange). The bioluminescent signals at 48- and 72-hours post-transfection were two-fold and nine-fold higher  
288 than that at 24-hours post-transfection, respectively (Figure 4B). The results suggested that although the signal  
289 from 24-hours post-transfection was sufficient for typical measurement, a longer period such as 48 or 72-hours  
290 could increase the signal significantly. The higher signals upon longer post-transfection times indicate that Lux  
291 is stable inside the cells and could accumulate signals upon prolonged cell growth. The stability of the  
292 intracellular FLUX protein makes the system suitable for high-throughput screening applications.

293 Third, we explored the suitable amount of vector required for transfection. Typically, a 96-well culture  
294 plate is commonly used for high-throughput screening applications and the amount of vector of 100 ng is  
295 normally recommended for transfection per well. We investigated the effects of the vector amount used for  
296 transfection on the Flux signals using FLUX/Rluc combination as a model for investigation. The amount of  
297 FLUX and Rluc reporter genes was varied from 20:2 ng to 320:32 ng, covering a range recommended for  
298 transfection and maintaining a final ratio of 10:1. The transfected cells were harvested at 24-hours post-  
299 transfection and the bioluminescent signals were measured in cell lysate. The results showed that even at the  
300 lowest amount of the pGL3[FLUX/SV40] vector (20 ng), a high S/N ratio could be obtained (Figure 4-figure  
301 supplement 2, orange,). Both FLUX and Rluc signals could be increased directly according to the amount of  
302 transfected vector (Figure 4-figure supplement 2, orange, and purple, respectively). Results in Figure 4C showed  
303 that the normalized FLUX signals which were obtained from dividing the original FLUX with Rluc signals were  
304 similar at all ratios investigated. The data suggest that FLUX could be used as a target reporter gene with  
305 requirement of only 20 ng per transfection.

306

### 307 **Combined use of FLUX, Fluc and Rluc as target/control vectors for luciferase-reporter gene assays**

308 In transient transfection experiments, two types of vectors including target and control vectors are generally  
309 required, and the results shown in the previous section indicate that the FLUX system developed here gives  
310 signals suitable for reporter gene applications. We thus investigated the combined use of FLUX *versus* Fluc and

311 Rluc in target/control reporter sets including 1. FLUX/Rluc, 2. FLUX/Fluc and 3. Fluc/FLUX in comparison  
312 with 4. the standard Fluc/RLuc combination set generally used in luciferase bioreporter experiments. These  
313 combined vector sets with varying ratios of target:control vectors from 10:1 to 10:20 were used for measuring  
314 their light signals. Ideally, consistency of light signals with varying ratios of vectors would indicate robustness  
315 of a reporter system as a measurement tool. In real practical experiments, concentrations of target and control  
316 vectors may not be exactly the same at each transfection reaction and a good reporter tool should not be overly  
317 affected by this variation as this could create artifact signals that interfere with the effects of the experimental  
318 parameters one wants to address (Schagat et al., 2007). In this experiment, we measured signals generated by  
319 target reporters with varying amounts of control reporters (Figure 5-figure supplement 1) and compared these  
320 values with the target reporter signals in the absence of control vector (calculated as % signal measured, Figure  
321 5). Results in Figure 5 showed that the combination set 2. FLUX/Fluc, showed the most consistent light signals  
322 when varying the vector ratios because their percent signal measured was almost unperturbed even at the highest  
323 amount of control vector (target:control = 10:20) (Figure 5B). The use of FLUX/Rluc is also acceptable for  
324 target:control vector ratios of up to 10:2. In the standard combination of Fluc/Rluc (Figure 5D) and FLUX/Rluc  
325 (Figure 5A), the systems gave consistent percent signal measured with target:control ratios of 10:1- 10:2, and  
326 the signals decreased at the higher target:control ratios. The behavior of the standard Fluc/Rluc combination  
327 were similar to those reported previously (Schagat et al., 2007). The results also showed that the combined use  
328 of Fluc/FLUX gave the highest variation in percent signal measured when the target:control vector ratios were  
329 varied (Figure 5C). Altogether, the data indicate that the combined use of FLUX/Fluc (Set 2) gave the most  
330 ideal properties for their combined use as a target and control reporter set.

331

332 **Demonstrating the use of combined FLUX/Fluc reporter gene systems for investigating**  
333 **activators/inhibitors of the NF- $\kappa$ B cell signaling pathway.**

334 The nuclear factor- $\kappa$ B (NF- $\kappa$ B) transcription factor plays a critical role in inflammation, immunity, and  
335 cell proliferation, differentiation, and survival which are relevant to several diseases including cancers (Hoesel  
336 & Schmid, 2013; Oeckinghaus & Ghosh, 2009). Therefore, bioactive compounds capable of controlling signal

337 transduction and gene regulation of this pathway are desired candidates for development of active  
338 pharmaceuticals (Oeckinghaus & Ghosh, 2009; Pahl, 1999). Luciferase reporter gene assays have been used as  
339 a valuable technique for screening NF- $\kappa$ B bioactive compounds because of their high sensitivity and broad  
340 range of detection. Therefore, we used the new combined FLUX/Fluc reporter system to measure the effects of  
341 Tumor Necrosis Factor (TNF)  $\alpha$ , a known activator of the NF- $\kappa$ B signaling pathway, and compared it with the  
342 use of the standard Fluc/Rluc gene reporter combination.

343 To compare the sensitivity of both FLUX/Fluc and Fluc/Rluc reporter systems in measuring the effects  
344 of TNF $\alpha$ , the *FLUX* and *luc+* reporter genes were constructed as reporter genes downstream of six tandem  
345 repeats of NF- $\kappa$ B transcriptional element with a TK promoter to obtain the pGL3-NF- $\kappa$ B[*FLUX/TK*] vector and  
346 a pGL3-NF- $\kappa$ B [*luc+/TK*] vector, respectively (Figure 6-figure supplement 1A and 1B). Combined sets of  
347 luciferase-reporter gene systems including 1. pGL3- NF- $\kappa$ B [*FLUX/TK*] vector with pGL3 [*luc+/SV40*] vector  
348 and 2. pGL3[*luc+/TK*] vector with pRT-TK control vector were transfected into HEK293T cells in the presence  
349 or absence of TNF $\alpha$ . The results showed that both sets of vector combinations gave similar signal increment  
350 responses to TNF $\alpha$ , 14 $\pm$ 3-folds and 11 $\pm$ 2-folds increment for FLUX/Fluc and Fluc/Rluc combination,  
351 respectively (Figure 6A, orange bar and purple bar, respectively). By varying concentrations of TNF $\alpha$ , the  
352 effects of TNF $\alpha$  dose-response on each reporter system can be calculated. The results showed sigmoidal dose-  
353 response curves corresponding to half-maximal response concentrations (EC50) of TNF $\alpha$  of 1.3 $\pm$ 0.3ng/mL and  
354 1.4 $\pm$ 0.7 ng/mL for FLUX/Fluc and Fluc/Rluc combination, respectively (Figure 6B and 6C, respectively). The  
355 data clearly showed that a new combination of FLUX as the target vector and Fluc as the control vector displays  
356 similar sensitivity to the standard combined Fluc/Rluc reporter gene. It should be noted that the FLUX/Fluc  
357 gave a slightly better and consistent curve, with a lower variation value, 1.3 $\pm$ 0.3 ng/mL *versus* 1.4 $\pm$ 0.7 ng/mL.

358 We further tested the ability of the new combined luciferase-reporter gene system for examining the  
359 inhibition of NF- $\kappa$ B using the known NF- $\kappa$ B inhibitors, parthenolide and sulfasalazine (Kwok et al., 2001;  
360 Weber et al., 2000). The pGL3- NF- $\kappa$ B [*FLUX/TK*] vector and pGL3[*luc+/SV40*] control vectors were  
361 transfected into HEK293T cells and the resulting transfected cells were incubated with various concentrations  
362 of the tested drugs. The results showed that half-maximum inhibitor concentrations (IC50) of parthenolide and

363 sulfasalazine were calculated as 2.1  $\mu$ M and 430  $\mu$ M, respectively (Figure 6D and 6E, respectively). These  
364 values are similar to those previously reported values, 1.5  $\mu$ M and 625  $\mu$ M for parthenolide and sulfasalazine,  
365 respectively (Fakhrudin et al., 2014; Lakey & Cawston, 2009). Altogether, our results clearly indicate that the  
366 FLUX/Fluc reporter system can serve as an alternative luciferase-reporter gene assay which gives good  
367 precision and robustness for screening of pharmaceutical active compounds such as inhibitors of the NF- $\kappa$ B  
368 pathway. The low cost of FLUX (~1/100 or ~1/150 compared to other gene reporters) would allow researchers  
369 with limited funding to access technology without a high cost barrier, creating opportunities for life science  
370 development in poor countries.

371

### 372 **A general guideline for using *FLUX* as a gene reporter**

373 A *FLUX* reporter gene consists of 2076 nucleotide bases encoding for 692 residues (Figure 1-figure supplement  
374 1) of the optimized *lux* gene for heterologous expression in mammalian cells. The complete *FLUX* sequence is  
375 also available in the NCBI database with GenBank number MZ393808. The *FLUX* gene can be used for  
376 constructing a reporter gene in any mammalian expression vector by placing it downstream of a  
377 constitutive/inductive promoter or transcription element. For transient transfection, either the *Fluc* gene or *Rluc*  
378 gene can be used as a control for the FLUX target vector.

379

## 380 **DISCUSSION**

381 This report describes the construction, optimization, validation and demonstration of applications of  
382 Lux from *V. campbellii* (*Vc\_Lux*) for luciferase-reporter gene assays in mammalian cell systems. By changing  
383 the codon usage of the *Vc\_Lux* gene and optimizing assay reagents, we created the Flavin Luciferase for  
384 Mammalian Expression (FLUX) system, which can be used as a gene reporter for mammalian cell expression.  
385 Based on detailed comparison of FLUX and the existing FLuc, FLUX shows higher signal to background (S/N)  
386 ratios than FLuc in HepG2 cells and comparable signals in other cell types. Intracellular FLUX is quite stable  
387 inside the cell for more than 72 hours, suggesting that it can be used in high throughput screening assays with



388 high sensitivity over a broad detection range. We demonstrated that FLUX could be used as the target vector  
389 and control vector. The combination using FLUX as a target vector and Fluc as a control vector gave the most  
390 consistent signal output even better than using the combined Fluc and Rluc set. The new combined FLUX/Fluc  
391 is a sensitive detection tool which can be used for detecting Tumor Necrosis Factor (TNF)-alpha and for  
392 screening of inhibitors of the NF- $\kappa$ B cell signaling pathway. As the cost of FLUX system is much lower than  
393 other systems, this technology allows the use of luciferase reporter genes with a much lower price, ~1/100 or  
394 ~1/150 compared to other gene reporters.

395 The newly combined FLUX/Fluc gene-reporter system gave the most consistent signals amongst all  
396 systems tested (Figure 5B and Figure 5-figure supplement 1B). It can give consistent signals throughout a wide  
397 range of target:control ratios (10:1 up to 10:20) which is broader than the commonly used Fluc/Rluc gene  
398 reporter system (Figure 5D, and Figure 5-figure supplement 1D). The main reason behind this distinguishing  
399 feature is not clear. However, we hypothesize that this is due to stability of intracellular half-life of FLUX. The  
400 intracellular half-life of FLUX measured by inhibiting the translation process using cycloheximide was found  
401 to be much longer than 4 hours (data not shown) which is significantly longer than Fluc and RLuc (3 and 4.5  
402 hours, respectively (Thorne et al., 2010)). Because cells have limitations for exogenous expression of all  
403 transfected genes (Hunter et al., 2019; Kaufman, 2000), high amounts of control vector for transfection may  
404 affect protein translation of the target reporter gene as is the case for data shown in Fig 5A, 5C and 5D. The  
405 long intracellular half-life of FLUX would make the system stably express its gene with less sensitivity towards  
406 the amount of the control vector used. The stable signals of FLUX after the post-transfection period (Figure 4B)  
407 also provides better advantages in transient transfection because a stable reporter gene gives less variation signal  
408 due to assay timing (Thompson et al., 1991) and is suitable as a reporter system in high throughput screening  
409 (HTP) applications because the system would be able to tolerate the long period of time needed for processing  
410 thousands of samples. The potential application of FLUX in drug screening has been shown in measurement  
411 of IC<sub>50</sub> of the known NF- $\kappa$ B inhibitors, parthenolide and sulfasalazine (Figure 6D and 6E, respectively).  
412 However, the control vector of the FLUX reporter gene is not limited to only Fluc and Rluc. Researchers can  
413 employ a cheaper vector such as  $\beta$ -galactosidase pSV- $\beta$ -Galactosidase as a control vector.

414 The FLUX reporter gene can be overexpressed in various types of cell-line such as Human Embryonic  
415 Kidney cells (HEK293), Mouse Embryotic Fibroblast cells (NIH3T3), Monkey Kidney Epithelial cells (COS),  
416 Human hepatocellular carcinoma cells (HepG2). The first three cell lines are the most commonly used cell lines  
417 for biomedical research (Verma et al., 2020). In particular, HEK293 cells and its derivatives have been used  
418 extensively in the transfection-based experiments, protein expression, and productions of biologics and  
419 pharmaceuticals production (Verma, 2014). They have high efficiency of transfection and protein production,  
420 and demonstrate reliable translation and processing of protein targets (Thomas & Smart, 2005). Although the  
421 ability of the FLUX reporter gene to be overexpressed in HEK293T cells was less than that in COS1, HepG2,  
422 and NIH3T3 cells, the obtained signals are sufficient for detection of dynamic changes in cell signaling in  
423 response to effectors as illustrated by measuring TNF-alpha effects on the NF- $\kappa$ B cell signaling pathway (Figure  
424 5). As our experiments demonstrated that the FLUX reporter gene can function well even in the least favorable  
425 cells, the results endorse the use of FLUX system in more favorable HepG2, COS1, NIH3T3 cells. Therefore,  
426 we think that the FLUX reporter gene should be a valuable tool for transfection-based experiments and their  
427 related implications such as protein tracking, promoter screening, cell signaling and bioactive compounds  
428 screening. For example, we think that the FLUX reporter gene can be applied for detecting active compounds  
429 for other cell signaling pathways such as PI3K/Akt and JAK/STAT signaling pathways that regulate cell growth,  
430 proliferation, migration, and apoptosis, which are critical process for tumorigenesis that is a serious problems  
431 in low- to middle-income countries (Gelband et al., 2015; Luo et al., 2003; Rawlings et al., 2004). Moreover,  
432 our results suggest that FLUX can be used in replacement of Fluc in various applications such as in the systems  
433 where compounds such as resveratrol and benzothiazoles derivatives, known inhibitors of Fluc, are present  
434 (Bakhtiarova et al., 2006; Braeuning & Vetter, 2012; Leitão & da Silva, 2010).

435 We also noted that the FLUX reporter gene gives outstanding signals in HepG2 cells, yielding much  
436 higher S/N than that the Fluc reporter gene (Figure 3). HepG2 is a human hepatocellular carcinoma cell which  
437 has drug metabolizing enzymes comparable to normal hepatocytes. The cells can be cultivated *in vitro* and used  
438 for drug testing conveniently (Castell et al., 2006). Although HepG2 is less used for investigating cellular  
439 signaling and events than other cell types, it is commonly used for drug cytotoxicity screening and investigating  
440 drug toxic mechanisms. We hope that the FLUX reporter gene developed here which can be expressed well in

441 HepG2 cells can contribute to future drug cytotoxicity screening and many other applications related to this  
442 cell-line.

443

## 444 MATERIALS AND METHODS

### 445 Key Resources Table

| <b>Reagent type<br/>(species) or<br/>resource</b> | <b>Designation</b>                                          | <b>Source or<br/>reference</b>          | <b>Identifiers</b> | <b>Additional<br/>information</b> |
|---------------------------------------------------|-------------------------------------------------------------|-----------------------------------------|--------------------|-----------------------------------|
| <b>Cell line</b>                                  | Human embryonic<br>kidney cells (HEK293T<br>cells)          | RIKEN<br>BioResource<br>Research Center | RCB2202            |                                   |
| <b>Cell line</b>                                  | Human hepatocyte<br>carcinoma cancer cells<br>(HepG2 cells) | RIKEN<br>BioResource<br>Research Center | RCB1886            |                                   |
| <b>Cell line</b>                                  | Mouse embryonic<br>fibroblast cells (NIH3T3<br>cells)       | RIKEN<br>BioResource<br>Research Center | RCB2767            |                                   |
| <b>Cell line</b>                                  | Monkey kidney cells<br>(COS-1)                              | RIKEN<br>BioResource<br>Research Center | RCB0143            |                                   |
| <b>Strain</b>                                     | Escherichia coli<br>BL21(DE3)                               | Millipore                               | 69450              |                                   |
| <b>Strain</b>                                     | Escherichia coli<br>XL1(blue)                               | Millipore                               |                    |                                   |

|                                |                                              |                                        |       |
|--------------------------------|----------------------------------------------|----------------------------------------|-------|
| <b>Recombinant DNA reagent</b> | pGL3 [ <i>luc+</i> ] vector                  | Promega Corporation                    | E1751 |
| <b>Recombinant DNA reagent</b> | pGL3 [ <i>luc+</i> /SV40] vector             | Promega Corporation                    | E1741 |
| <b>Recombinant DNA reagent</b> | pGL4 [ <i>luc2</i> ] vector                  | Promega Corporation                    | E6651 |
| <b>Recombinant DNA reagent</b> | pGL4 [ <i>luc2</i> /SV40] vector             | Promega Corporation                    | E6681 |
| <b>Recombinant DNA reagent</b> | pRL-TK vector                                | Promega Corporation                    | E2241 |
| <b>Recombinant DNA reagent</b> | pGL3-NF- $\kappa$ B[ <i>luc+</i> /TK] vector | This study                             |       |
| <b>Recombinant DNA reagent</b> | pGL3 [ <i>lux</i> ] vector                   | Previous report (Tinikul et al., 2012) |       |
| <b>Recombinant DNA reagent</b> | pGL3 [ <i>lux</i> /SV40] vector              | Previous report (Tinikul et al., 2012) |       |
| <b>Recombinant DNA reagent</b> | pGL3 [ <i>FLUX</i> ] vector                  | This study                             |       |
| <b>Recombinant DNA reagent</b> | pGL3 [ <i>FLUX</i> /SV40] vector             | This study                             |       |
| <b>Recombinant DNA reagent</b> | pGL4 [FLUX] vector                           | This study                             |       |
| <b>Recombinant DNA reagent</b> | pGL4 [FLUX/SV40] vector                      | This study                             |       |

|                                |                                                   |                                         |                   |                 |
|--------------------------------|---------------------------------------------------|-----------------------------------------|-------------------|-----------------|
| <b>Recombinant DNA reagent</b> | pGL3-NF-<br>κB[FLUX/TK] vector                    | This study                              |                   |                 |
| <b>Antibody</b>                | Anti-flux (Rabbit Polyclonal) IgG                 | Self-made                               |                   | WB<br>(1:20000) |
| <b>Antibody</b>                | Anti-Beta-Actin(C4) IgG (Mouse monoclonal)        | Santa Cruz Biotechnology                | SC-47778          | WB (1:5000)     |
| <b>Antibody</b>                | Mouse anti-rabbi IgG-HRP                          | Santa Cruz Biotechnology                | SC-2357           | WB (1:1000)     |
| <b>Antibody</b>                | Goat anti-mouse IgG-HRP                           | Santa Cruz Biotechnology                | SC-2005           | WB (1:1000)     |
| <b>Chemical compound, drug</b> | Dulbecco's Modified Eagle's Medium - high Glucose | Fujifilm Wako Pure Chemical Corporation | Cat No. 044-29765 |                 |
| <b>Chemical compound, drug</b> | Dulbecco's Modified Eagle's Medium - low Glucose  | Fujifilm Wako Pure Chemical Corporation | Cat No. 041-29775 |                 |
| <b>Chemical compound, drug</b> | 0.25w/v% Trypine-1 mmol/L EDTA· 4Na solution      | Fujifilm Wako Pure Chemical Corporation | Cat No. 209-16941 |                 |
| <b>Chemical compound, drug</b> | Penicillin-Streptomycin Solution (x100)           | Fujifilm Wako Pure Chemical Corporation | Cat No. 168-23191 |                 |
| <b>Chemical compound, drug</b> | Fetal Bovine Serum (FBS)                          | Fujifilm Wako Pure Chemical Corporation | Cat No. 554-04855 |                 |

|                                |                                                      |                         |                     |
|--------------------------------|------------------------------------------------------|-------------------------|---------------------|
| <b>Chemical compound, drug</b> | Lipofectamine 30000 Transfection Reagent             | Invitrogen              | Cat No. L3000015    |
| <b>Chemical compound, drug</b> | Poly-D-lysine hydrobromide                           | Sigma-Aldrich           | Cat No. P6407       |
| <b>Chemical compound, drug</b> | Cycloheximide                                        | Nacalai Tesque          | Cat No. 06741-91    |
| <b>Chemical compound, drug</b> | Western Blot Immuno Booster                          | Takara Bio              | Cat# T7111A         |
| <b>Chemical compound, drug</b> | Tumor Necrosis Factor- $\alpha$ human, hTNF $\alpha$ | Sigma-Aldrich           | Cat No. 11088939001 |
| <b>Chemical compound, drug</b> | Sulfasalazine                                        | Sigma-Aldrich           | Cat No. S0883       |
| <b>Chemical compound, drug</b> | Parthenolide                                         | Sigma-Aldrich           | Cat No. P0667       |
| <b>Chemical compound, drug</b> | Decanal                                              | Tokyo Chemical Industry | Cat No. D0032       |
| <b>Chemical compound, drug</b> | NADH                                                 | Tokyo Chemical Industry | Cat No. D0920       |
| <b>Chemical compound, drug</b> | FMN                                                  | Tokyo Chemical Industry | Cat No. R0023       |
| <b>Chemical compound, drug</b> | Sodium phosphate                                     | Merck                   | Cat No. 1063421000  |
| <b>Chemical compound, drug</b> | CHAPS                                                | Nacalai Tesque          | Cat No. 07957-64    |
| <b>Chemical compound, drug</b> | Glycerol                                             | OmniPur                 | Cat No. 1040941000  |

|                                |                                              |                                 |                                                                 |
|--------------------------------|----------------------------------------------|---------------------------------|-----------------------------------------------------------------|
| <b>Chemical compound, drug</b> | EDTA                                         | Merck                           | Cat No.<br>324503                                               |
| <b>Commercial assay or kit</b> | EzWestLumi plus                              | ATTO Corporation                | WSE-7120S                                                       |
| <b>Commercial assay or kit</b> | Luciferase Assay system                      | Promega Corporation             | E1500                                                           |
| <b>Commercial assay or kit</b> | Renilla luciferase assay system              | Promega Corporation             | E2810                                                           |
| <b>Commercial assay or kit</b> | Plasmid DNA extraction mini kit              | FavorPrep™                      | FAPDE001                                                        |
| <b>Commercial assay or kit</b> | Proteostain-Protein Quantification Kit-Rapid | Donjindo Molecular Technologies | PQ01                                                            |
| <b>Software</b>                | GraphPad Prism7.03                           | GraphPad                        | <a href="https://www.graphpad.com">https://www.graphpad.com</a> |
| <b>Software</b>                | ATTO Image Analysis software CS Analyzer 4   | CS Analyzer 4                   | ATTO Corporation                                                |

446

447 **Mammalian cell culture, transient transfection, and cell harvesting**

448 Human Embryonic Kidney (HEK293T) [RCB2202] cells and human hepatocyte carcinoma cancer cells (HepG2  
449 cells) [RCB1886] were grown in Dulbecco's Modified Eagle Medium (DMEM)-low glucose supplemented  
450 with 10% (v/v) heat-inactivated fetal bovine serum plus 1% (w/v) penicillin-streptomycin. Mouse embryonic  
451 fibroblast cells (NIH3T3 cells) [RCB2767] and monkey kidney cells (COS1) [RCB0143] were grown in DEME-  
452 high glucose supplemented with 10% (v/v) heat-inactivated fetal bovine serum plus 1% (w/v) penicillin-  
453 streptomycin. Four types of cells were maintained at 37 °C with 5% CO<sub>2</sub>. For transient transfection, 1×10<sup>5</sup> cells  
454 per well were plated and cultured in suitable DEME media supplemented with 10% (v/v) heat-inactivated fetal



455 bovine serum in 24 well plates for one day prior to transfection. Cells were transfected by adding 0.07 pmol of  
456 target vector and 0.007 pmol of for control vector with lipofectamine<sup>TM</sup>3000 in DEME-free serum. The  
457 transfected cells were maintained for 24-72 hours. Cells were harvested by washing cells with 500  $\mu$ l PBS buffer  
458 pH 7.4 and detached cells were collected using specific lysis buffer. A 1x Passive Lysis Buffer was used for  
459 collecting Fluc transfected cell while a 1x Lux Lysis Reagent (LLR) was used for collecting FLUX transfected  
460 cells. The lysate was kept at -80 °C until used.

#### 461 **Protein extraction and protein concentration determination**

462 Cells were lysed by a freezing-thawing process (freezing at -80 °C for 10 min and thawing at room temperature  
463 water for 2 min). The cell lysate was collected by centrifugation at 12000 rpm at 4 °C for 10 min. Total protein  
464 concentration was determined using Proteostain-Protein Quantification Rapid-Kit (Donjindo Molecular  
465 Technologies) according to the manufacturer's instructions. The absorbance change at 595 nm was measured  
466 using a microplate reader spectrophotometer (iMark<sup>TM</sup>, BioRad). A plot of absorbance change *versus* BSA  
467 concentration was used as a standard curve. Protein concentrations of cell lysate were calculated based on the  
468 standard curve.

#### 469 **Measurement of luciferase activity in cell lysate**

470 Activity of luciferase was assayed by monitoring light emission using AB-2250 single tube luminometer (ATTO  
471 Corporation, Japan). The Lux cocktail reagent consisting of 5  $\mu$ M FMN, 10  $\mu$ M decanal, 100  $\mu$ M *p*-  
472 hydroxyphenylacetic acid (HPA), and 100  $\mu$ M NADH in 50 mM sodium phosphate buffer pH 7.0. was injected  
473 into a reaction chamber containing 2-10  $\mu$ L of cell lysate and 50 mU of C<sub>1</sub> reductase. The light emission was  
474 monitored for 10 second with 2 second delay. Fluc and Rluc activities were measured using firefly luciferase  
475 and Renilla Luciferase Assay Reagents, E1500 and E2810 (Promega Corporation, Wisconsin, USA),  
476 respectively according to the manufacturer's instructions. The integrated peak area was reported as relative light  
477 units (RLU). Signal of luciferase-based experiments were normalized using light emitted from the control vector.

478

479

#### 480 **Measurement of purified Lux activity**

481 Activity of purified Lux was assayed by monitoring light emission using an AB-2250 single tube luminometer  
482 (ATTO Corporation, Japan). A Lux cocktail reagent consisting of 5  $\mu$ M FMN, 10  $\mu$ M decanal, 100  $\mu$ M *p*-  
483 hydroxyphenylacetic acid (HPA), and 100  $\mu$ M NADH in in 50 mM sodium phosphate buffer pH 7.0. was  
484 injected into a reaction chamber consisting of 2  $\mu$ L of purified Lux and 50 mU of C<sub>1</sub> reductase. The light  
485 emission was monitored for 10 second with 2 second delay. The integrated peak area was reported as relative  
486 light units (RLU).

#### 487 **Western blot analysis**

488 The cell lysate was separated by 12.5% (w/v) SDS-PAGE electrophoresis (ATTO Cooperation, Japan) and  
489 transferred onto a PVDF membrane (Bio-rad, USA). The membrane blots were blocked in 1x EzBlockChemi  
490 (ATTO Cooperation, Japan) for 1 hour at room temperature and then incubated with primary antibody (Anti-  
491 flux IgG / Anti- $\beta$ -actin IgG) which was diluted in Solution I of Western BLoT Immuno Booster (ATTO  
492 Cooperation, Japan) for 24 hours. at 4 °C. The membrane was washed by TBS-T for 3 times before incubating  
493 in HRP-conjugated secondary antibodies (mouse-anti-rabbit HRP / goat-anti-mouse HRP) for 1 hour at room  
494 temperature. The membrane was washed 3-times using TBS-T before incubating in chemiluminescent reagent  
495 for HRP (EzWestLumi plus, ATTO Cooperation, Japan). The chemiluminescence was detected by WSE-6100  
496 LuminoGraph I Gel documentation system (ATTO Cooperation, Japan). The band intensity was measured by  
497 ATTO Image Analysis software CS Analyzer 4 (ATTO Cooperation, Japan).

#### 498 **Validation of novel dual-luciferase assay using NF- $\kappa$ B transcription element**

499 Four sets of validated reporter genes (Table 1) were independently transfected into  $5 \times 10^5$  HEK293T cells that  
500 were plated one day prior to transfection in 6-well plates using lipofectamine<sup>TM</sup>3000 in DEME-free serum. After  
501 12 hours post-transfection, the transfected cells were washed, trypsinized, and seeded on a 96-well plate. The  
502 culture plate was incubated for 24 hours at 37 °C with 5% CO<sub>2</sub>. The culture medium was then changed to a  
503 new medium either supplied with 0.005-10 ng/mL of TNF $\alpha$  or without TNF $\alpha$ . The transfected cells were  
504 continuously stimulated for 6 hours. Cells were harvested by washing cells with 500  $\mu$ l PBS buffer pH 7.4 and

505 collecting using specific lysis reagent. A 20-50  $\mu$ L of 1x Passive Lysis Buffer was used for collecting firefly  
506 luciferase transfected cell while 20-50  $\mu$ L of 1x Lux Lysis Reagent (LLR) was used for collecting bacterial  
507 luciferase transfected cells. The luciferase activity was independently measured according to the measurement  
508 protocol described above.

509

510 **Table 1.** Four combinations of reporter genes for validating the function of FLUX reporter gene

| Condition | NF- $\kappa$ B reporter vector                    | Internal control vector              |
|-----------|---------------------------------------------------|--------------------------------------|
| 1         | pGL3-NF- $\kappa$ B[ <i>luc</i> <sup>+</sup> /TK] | pRL-TK vector                        |
| 2         | pGL3-NF- $\kappa$ B[ <i>FLUX</i> /TK]             | pRL-TK vector                        |
| 3         | pGL3-NF- $\kappa$ B[ <i>luc</i> <sup>+</sup> /TK] | pGL3 [ <i>FLUX</i> /SV40]            |
| 4         | pGL3-NF- $\kappa$ B[ <i>FLUX</i> /TK]             | pGL3[ <i>luc</i> <sup>+</sup> /SV40] |

511

512 **Use of a new combined FLUX/Fluc for demonstrating investigation of inhibitors of the NF- $\kappa$ B signaling**  
513 **pathway**

514 The pGL3-NF- $\kappa$ B[*FLUX*/TK] and pGL3 [*luc*<sup>+</sup>/SV40] vectors were co-transfected into  $5 \times 10^5$  HEK293T cells  
515 that were plated one day prior to transfection in 6-well plates using lipofectamine<sup>TM</sup>3000 in DEME-free serum.  
516 After 12 hours post-transfection, the transfected cells were washed, trypsinized, and seeded on a 96-well plate.  
517 The culture plate was incubated for 24 hours at 37 °C with 5% CO<sub>2</sub>. The culture medium was then changed to  
518 a new medium supplied with various concentrations of inhibitors for 30 min before stimulating the system by  
519 adding 10 ng/mL of TNF $\alpha$  for 6 hours. The cells were then collected by adding 50  $\mu$ L of Lux Lysis Reagent  
520 (LLR) and luciferase activities were independently measured. The activity of Lux was monitored by adding 100  
521  $\mu$ L of a cocktail reagent consisting of 5  $\mu$ M FMN, 100  $\mu$ M HPA, 10  $\mu$ M decanal, and 100  $\mu$ M NADH into 2-  
522 10  $\mu$ L of cell lysate freshly mixed with 50 mU of C<sub>1</sub> reductase. The luminescence signal was monitored for 10  
523 sec with a 2 sec delay using an AB-2250 single luminometer (ATTO Corporation, Japan). The Fluc activity was

524 measured using firefly Luciferase Assay Reagent [E2810, Promega Corporation, USA] according to the  
525 manufacturer's instructions.

526

## 527 **ACKNOWLEDGMENTS**

528 This work was supported by grants from Vidyasrimedhi Institute of Science and Technology (VISTEC) and  
529 from the Global Partnership grant from Program Management Unit-B (to P.C. and J. P.) and partially supported  
530 by the National Institute of Advanced Industrial Science and Technology (AIST) to Y.O., and the Central  
531 Instrument Facility (CIF), Faculty of Science, Mahidol University to R.T. We would like to thank Frank Fan,  
532 Promega company for the generous gift of pGL4.13[luc2/SV40] vector and pGL4.10[luc2] vectors.

## 533 **REFERENCE**

- 534 Alkemade, C. T. J., Snelleman, W., Boutilier, G., Pollard, B., Winefordner, J., Chester, T., & Omenetto, N.  
535 (1978). A review and tutorial discussion of noise and signal-to-noise ratios in analytical spectrometry—  
536 I. Fundamental principles of signal-to-noise ratios. *Spectrochimica Acta Part B: Atomic Spectroscopy*,  
537 33(8), 383-399. [https://doi.org/https://doi.org/10.1016/0584-8547\(78\)80049-4](https://doi.org/https://doi.org/10.1016/0584-8547(78)80049-4)
- 538 Bakhtiarova, A., Taslimi, P., Elliman, S. J., Kosinski, P. A., Hubbard, B., Kavana, M., & Kemp, D. M. (2006).  
539 Resveratrol inhibits firefly luciferase. *Biochemical and biophysical research communications*, 351(2),  
540 481-484. <https://doi.org/10.1016/j.bbrc.2006.10.057>
- 541 Braeuning, A., & Vetter, S. (2012). The nuclear factor  $\kappa$  B inhibitor (E)-2-fluoro-4'-methoxystilbene inhibits  
542 firefly luciferase. *Bioscience reports*, 32(6), 531-537. <https://doi.org/10.1042/BSR20120043>
- 543 Branchini, B. R., Magyar, R. A., Murtiashaw, M. H., Anderson, S. M., & Zimmer, M. (1998). Site-directed  
544 mutagenesis of histidine 245 in firefly luciferase: a proposed model of the active site. *Biochemistry*,  
545 37(44), 15311-15319. <https://doi.org/10.1021/bi981150d>
- 546 Castell, J. V., Jover, R., Martnez-Jimnez, C. P., & Gmez-Lechn, M. J. (2006). Hepatocyte cell lines: their use,  
547 scope and limitations in drug metabolism studies. *Expert opinion on drug metabolism & toxicology*,  
548 2(2), 183-212. <https://doi.org/10.1517/17425255.2.2.183>
- 549 Class, B., Thorne, N., Aguisanda, F., Southall, N., McKew, J. C., & Zheng, W. (2015). High-throughput  
550 viability assay using an autonomously bioluminescent cell line with a bacterial lux reporter. *Journal of*  
551 *laboratory automation*, 20(2), 164-174. <https://doi.org/10.1177/2211068214560608>
- 552 Close, D. M., Patterson, S. S., Ripp, S., Baek, S. J., Sanseverino, J., & Saylor, G. S. (2010). Autonomous  
553 bioluminescent expression of the bacterial luciferase gene cassette (lux) in a mammalian cell line. *PloS*  
554 *one*, 5(8), e12441. <https://doi.org/https://doi.org/10.1371/journal.pone.0012441>
- 555 Cui, B., Zhang, L., Song, Y., Wei, J., Li, C., Wang, T., Wang, Y., Zhao, T., & Shen, X. (2014). Engineering an  
556 enhanced, thermostable, monomeric bacterial luciferase gene as a reporter in plant protoplasts. *PloS*  
557 *one*, 9(10), e107885. <https://doi.org/10.1371/journal.pone.0107885>
- 558 Dashnau, J. L., Nucci, N. V., Sharp, K. A., & Vanderkooi, J. M. (2006). Hydrogen bonding and the  
559 cryoprotective properties of glycerol/water mixtures. *The Journal of Physical Chemistry B*, 110(27),  
560 13670-13677. <https://doi.org/10.1021/jp0618680>
- 561 Díaz-García, M. E., & Badía-Lafino, R. (2019). Fluorescence | Overview. In P. Worsfold, C. Poole, A.  
562 Townshend, & M. Miró (Eds.), *Encyclopedia of Analytical Science (Third Edition)* (pp. 309-319).  
563 Academic Press. <https://doi.org/https://doi.org/10.1016/B978-0-12-409547-2.11182-5>

- 564 Doyle, K., & Promega, C. (1996). *Promega protocols and applications guide*. Promega Corp.
- 565 Eldridge, M. L., Sanseverino, J., Layton, A. C., Easter, J. P., Schultz, T. W., & Sayler, G. S. (2007).  
566 *Saccharomyces cerevisiae* BLYAS, a new bioluminescent bioreporter for detection of androgenic  
567 compounds. *Appl. Environ. Microbiol.*, 73(19), 6012-6018.  
568 <https://doi.org/https://doi.org/10.1128/AEM.00589-07>
- 569 Fakhrudin, N., Waltenberger, B., Cabaravdic, M., Atanasov, A., Malainer, C., Schachner, D., Heiss, E., Liu, R.,  
570 Noha, S., & Grzywacz, A. (2014). Identification of plumericin as a potent new inhibitor of the NF -  $\kappa$   
571 B pathway with anti - inflammatory activity in vitro and in vivo. *British journal of pharmacology*,  
572 171(7), 1676-1686. <https://doi.org/10.1111/bph.12558>
- 573 Fan, F., & Wood, K. V. (2007). Bioluminescent assays for high-throughput screening. *Assay and drug*  
574 *development technologies*, 5(1), 127-136. <https://doi.org/10.1089/adt.2006.053>
- 575 Fleiss, A., & Sarkisyan, K. S. (2019). A brief review of bioluminescent systems (2019). *Current genetics*, 65(4),  
576 877-882. <https://doi.org/10.1007/s00294-019-00951-5>
- 577 Gelband, H., Jha, P., Sankaranarayanan, R., & Horton, S. (2015). Cancer: disease control priorities, (volume 3).  
578 <https://doi.org/10.1596/978-1-4648-0349-9>
- 579 Gregor, C., Pape, J. K., Gwosch, K. C., Gilat, T., Sahl, S. J., & Hell, S. W. (2019). Autonomous bioluminescence  
580 imaging of single mammalian cells with the bacterial bioluminescence system. *Proceedings of the*  
581 *National Academy of Sciences*, 116(52), 26491-26496. <https://doi.org/10.1073/pnas.1913616116>
- 582 Hastings, J. W., Riley, W. H., & Massa, J. (1965). The purification, properties, and chemiluminescent quantum  
583 yield of bacterial luciferase. *Journal of Biological Chemistry*, 240(3), 1473-1481.  
584 [https://doi.org/https://doi.org/10.1016/S0021-9258\(18\)97598-8](https://doi.org/https://doi.org/10.1016/S0021-9258(18)97598-8)
- 585 Hoesel, B., & Schmid, J. A. (2013). The complexity of NF- $\kappa$ B signaling in inflammation and cancer. *Molecular*  
586 *cancer*, 12(1), 86. <https://doi.org/10.1186/1476-4598-12-86>
- 587 Hunter, M., Yuan, P., Vavilala, D., & Fox, M. (2019). Optimization of protein expression in mammalian cells.  
588 *Current protocols in protein science*, 95(1), e77. <https://doi.org/10.1002/cpp.77>
- 589 Kaufman, R. J. (2000). Overview of vector design for mammalian gene expression. *Molecular biotechnology*,  
590 16(2), 151-160. <https://doi.org/10.1385/MB:16:2:151>
- 591 Kwok, B. H., Koh, B., Ndubuisi, M. I., Elofsson, M., & Crews, C. M. (2001). The anti-inflammatory natural  
592 product parthenolide from the medicinal herb Feverfew directly binds to and inhibits I $\kappa$ B kinase.  
593 *Chemistry & biology*, 8(8), 759-766. [https://doi.org/10.1016/s1074-5521\(01\)00049-7](https://doi.org/10.1016/s1074-5521(01)00049-7)
- 594 Lakey, R. L., & Cawston, T. E. (2009). Sulfasalazine blocks the release of proteoglycan and collagen from  
595 cytokine stimulated cartilage and down-regulates metalloproteinases. *Rheumatology*, 48(10), 1208-  
596 1212. <https://doi.org/https://doi.org/10.1093/rheumatology/kep236>
- 597 Lei, B., Ding, Q., & Tu, S.-C. (2004). Identity of the emitter in the bacterial luciferase luminescence reaction:  
598 binding and fluorescence quantum yield studies of 5-decyl-4a-hydroxy-4a, 5-dihydroriboflavin-5 ' -  
599 phosphate as a model. *Biochemistry*, 43(50), 15975-15982. <https://doi.org/10.1021/bi0480640>
- 600 Leibly, D. J., Nguyen, T. N., Kao, L. T., Hewitt, S. N., Barrett, L. K., & Van Voorhis, W. C. (2012). Stabilizing  
601 additives added during cell lysis aid in the solubilization of recombinant proteins. *PloS one*, 7(12),  
602 e52482. <https://doi.org/10.1371/journal.pone.0052482>
- 603 Leitão, J. M., & da Silva, J. C. E. (2010). Firefly luciferase inhibition. *Journal of Photochemistry and*  
604 *Photobiology B: Biology*, 101(1), 1-8. <https://doi.org/10.1016/j.jphotobiol.2010.06.015>
- 605 Loening, A. M., Fenn, T. D., Wu, A. M., & Gambhir, S. S. (2006). Consensus guided mutagenesis of Renilla  
606 luciferase yields enhanced stability and light output. *Protein Engineering, Design and Selection*, 19(9),  
607 391-400. <https://doi.org/10.1093/protein/gzl023>
- 608 Luo, J., Manning, B. D., & Cantley, L. C. (2003). Targeting the PI3K-Akt pathway in human cancer: rationale  
609 and promise. *Cancer Cell*, 4(4), 257-262. [https://doi.org/10.1016/s1535-6108\(03\)00248-4](https://doi.org/10.1016/s1535-6108(03)00248-4)
- 610 Martinez, R., Lloyd-Sherlock, P., Soliz, P., Ebrahim, S., Vega, E., Ordunez, P., & McKee, M. (2020). Trends  
611 in premature avertable mortality from non-communicable diseases for 195 countries and territories,  
612 1990–2017: a population-based study. *The Lancet Global Health*, 8(4), e511-e523.  
613 [https://doi.org/10.1016/S2214-109X\(20\)30035-8](https://doi.org/10.1016/S2214-109X(20)30035-8)
- 614 Matthews, J. C., Hori, K., & Cormier, M. J. (1977). Purification and properties of Renilla reniformis luciferase.  
615 *Biochemistry*, 16(1), 85-91. <https://doi.org/10.1021/bi00620a014>



- 616 Meighen, E. A. (1991). Molecular biology of bacterial bioluminescence. *Microbiology and Molecular Biology*  
617 *Reviews*, 55(1), 123-142. <https://doi.org/10.1128/mr.55.1.123-142.1991>
- 618 Nakajima, Y., & Ohmiya, Y. (2010). Bioluminescence assays: multicolor luciferase assay, secreted luciferase  
619 assay and imaging luciferase assay. *Expert opinion on drug discovery*, 5(9), 835-849.  
620 <https://doi.org/10.1517/17460441.2010.506213>.
- 621 Naylor, L. H. (1999). Reporter gene technology: the future looks bright. *Biochemical pharmacology*, 58(5),  
622 749-757. [https://doi.org/10.1016/s0006-2952\(99\)00096-9](https://doi.org/10.1016/s0006-2952(99)00096-9)
- 623 Nijvipakul, S., Wongratana, J., Suadee, C., Entsch, B., Ballou, D. P., & Chaiyen, P. (2008). LuxG is a  
624 functioning flavin reductase for bacterial luminescence. *Journal of bacteriology*, 190(5), 1531-1538.  
625 <https://doi.org/10.1128/JB.01660-07>
- 626 Niwa, K., Ichino, Y., Kumata, S., Nakajima, Y., Hiraishi, Y., Kato, D. i., Viviani, V. R., & Ohmiya, Y. (2010).  
627 Quantum yields and kinetics of the firefly bioluminescence reaction of beetle luciferases.  
628 *Photochemistry and photobiology*, 86(5), 1046-1049. <https://doi.org/10.1111/j.1751-1097.2010.00777.x>
- 630 Oeckinghaus, A., & Ghosh, S. (2009). The NF- $\kappa$ B family of transcription factors and its regulation. *Cold Spring*  
631 *Harbor perspectives in biology*, 1(4), a000034. <https://doi.org/10.1101/cshperspect.a000034>
- 632 Paguio, A., Almond, B., Fan, F., Stecha, P., Garvin, D., Wood, M., & Wood, K. (2005). pGL4 Vectors: A new  
633 generation of luciferase reporter vectors. *Promega Notes*, 89(4).  
634 <https://www.promega.com/resources/pubhub/promega-notes-2005/pgl4-vectors-a-new-generation-of-luciferase-reporter-vectors/>
- 635 Pahl, H. L. (1999). Activators and target genes of Rel/NF- $\kappa$ B transcription factors. *Oncogene*, 18(49), 6853-  
636 6866. <https://doi.org/10.1038/sj.onc.1203239>
- 638 Patterson, S. S., Dionisi, H. M., Gupta, R. K., & Sayler, G. S. (2005). Codon optimization of bacterial luciferase  
639 (lux) for expression in mammalian cells. *Journal of industrial microbiology and biotechnology*, 32(3),  
640 115-123. <https://doi.org/10.1007/s10295-005-0211-8>
- 641 Phonbuppha, J., Tinikul, R., & Chaiyen, P. (2021). Use of Bacterial Luciferase as a Reporter Gene in Eukaryotic  
642 Systems. In *Live Cell Imaging* (pp. 53-65). Springer. [https://doi.org/10.1007/978-1-0716-1258-3\\_6](https://doi.org/10.1007/978-1-0716-1258-3_6)
- 643 Rawlings, J. S., Rosler, K. M., & Harrison, D. A. J. J. o. c. s. (2004). The JAK/STAT signaling pathway. *Journal*  
644 *of Cell Science*, 117(8), 1281-1283. <https://doi.org/10.1242/jcs.00963>
- 645 Riss, T., Moravec, R., & Niles, A. (2005). Selecting cell-based assays for drug discovery screening. *Cell Notes*,  
646 13, 16-21. [https://beta-static.fishersci.com/content/dam/fishersci/en\\_US/documents/programs/scientific/brochures-and-catalogs/publications/promega-selecting-cell-based-assays-drug-screening-publication.pdf](https://beta-static.fishersci.com/content/dam/fishersci/en_US/documents/programs/scientific/brochures-and-catalogs/publications/promega-selecting-cell-based-assays-drug-screening-publication.pdf)
- 648 Roda, A., Pasini, P., Mirasoli, M., Micheli, E., & Guardigli, M. (2004). Biotechnological applications of  
649 bioluminescence and chemiluminescence. *TRENDS in Biotechnology*, 22(6), 295-303.  
650 <https://doi.org/10.1016/j.tibtech.2004.03.011>
- 652 Sanseverino, J., Gupta, R. K., Layton, A. C., Patterson, S. S., Ripp, S. A., Saidak, L., Simpson, M. L., Schultz,  
653 T. W., & Sayler, G. S. (2005). Use of *Saccharomyces cerevisiae* BLYES expressing bacterial  
654 bioluminescence for rapid, sensitive detection of estrogenic compounds. *Appl. Environ. Microbiol.*,  
655 71(8), 4455-4460. <https://doi.org/10.1128/AEM.71.8.4455-4460.2005>
- 656 Schagat, T., Paguio, A., & Kopish, K. (2007). Normalizing genetic reporter assays: approaches and  
657 considerations for increasing consistency and statistical significance. *Cell Notes*, 17, 9-12.  
658 <https://www.promega.com/resources/pubhub/cellnotes/normalizing-genetic-reporter-assays/>
- 659 Sherf, B. A., Navarro, S. L., Hannah, R. R., & Wood, K. V. (1996). Dual-luciferase reporter assay: an advanced  
660 co-reporter technology integrating firefly and Renilla luciferase assays. *Promega Notes*, 57(2), 2-8.  
661 [https://www.researchgate.net/publication/238747666\\_Dual-Luciferase\\_TM\\_Reporter\\_Assay\\_An\\_Advanced\\_Co-Reporter\\_Technology\\_Integrating\\_Firefly\\_and\\_Renilla\\_Luciferase\\_Assays](https://www.researchgate.net/publication/238747666_Dual-Luciferase_TM_Reporter_Assay_An_Advanced_Co-Reporter_Technology_Integrating_Firefly_and_Renilla_Luciferase_Assays)
- 663 Suadee, C., Nijvipakul, S., Svasti, J., Entsch, B., Ballou, D. P., & Chaiyen, P. (2007). Luciferase from *Vibrio*  
664 *campbellii* is more thermostable and binds reduced FMN better than its homologues. *Journal of*  
665 *biochemistry*, 142(4), 539-552. <https://doi.org/10.1093/jb/mvm155>
- 667 Sucharitakul, J., Phongsak, T., Entsch, B., Svasti, J., Chaiyen, P., & Ballou, D. P. (2007). Kinetics of a two-  
668 component p-hydroxyphenylacetate hydroxylase explain how reduced flavin is transferred from the  
669 reductase to the oxygenase. *Biochemistry*, 46(29), 8611-8623. <https://doi.org/10.1021/bi7006614>

- 670 Tehrani, G. A., Mirzaahmadi, S., Bandehpour, M., & Kazemi, B. (2014). Coexpression of luxA and luxB genes  
671 of *Vibrio fischeri* in NIH3T3 mammalian cells and evaluation of its bioluminescence activities.  
672 *Luminescence*, 29(1), 13-19. <https://doi.org/10.1002/bio.2468>
- 673 Thomas, P., & Smart, T. G. (2005). HEK293 cell line: a vehicle for the expression of recombinant proteins.  
674 *Journal of pharmacological and toxicological methods*, 51(3), 187-200.  
675 <https://doi.org/10.1016/j.vascn.2004.08.014>
- 676 Thompson, J. F., Hayes, L. S., & Lloyd, D. B. (1991). Modulation of firefly luciferase stability and impact on  
677 studies of gene regulation. *Gene*, 103(2), 171-177. [https://doi.org/https://doi.org/10.1016/0378-  
678 1119\(91\)90270-L](https://doi.org/https://doi.org/10.1016/0378-1119(91)90270-L)
- 679 Thorne, N., Inglese, J., & Auld, D. S. (2010). Illuminating insights into firefly luciferase and other  
680 bioluminescent reporters used in chemical biology. *Chemistry & biology*, 17(6), 646-657.  
681 <https://doi.org/10.1016/j.chembiol.2010.05.012>
- 682 Tinikul, R., & Chaiyen, P. (2014). Structure, mechanism, and mutation of bacterial luciferase. In  
683 *Bioluminescence: Fundamentals and Applications in Biotechnology-Volume 3* (pp. 47-74). Springer.  
684 [https://doi.org/10.1007/10\\_2014\\_281](https://doi.org/10.1007/10_2014_281)
- 685 Tinikul, R., Chunthaboon, P., Phonbuppha, J., & Paladkong, T. (2020). Bacterial luciferase: Molecular  
686 mechanisms and applications. *The Enzymes*, 47, 427-455. <https://doi.org/10.1016/bs.enz.2020.06.001>
- 687 Tinikul, R., Pitsawong, W., Sucharitakul, J., Nijvipakul, S., Ballou, D. P., & Chaiyen, P. (2013). The transfer  
688 of reduced flavin mononucleotide from LuxG oxidoreductase to luciferase occurs via free diffusion.  
689 *Biochemistry*, 52(39), 6834-6843. <https://doi.org/https://doi.org/10.1021/bi4006545>
- 690 Tinikul, R., Thotsaporn, K., Thaveekarn, W., Jitrapakdee, S., & Chaiyen, P. (2012). The fusion *Vibrio*  
691 *campbellii* luciferase as a eukaryotic gene reporter. *Journal of biotechnology*, 162(2-3), 346-353.  
692 <https://doi.org/10.1016/j.jbiotec.2012.08.018>
- 693 Verma, A. (2014). Animal tissue culture: Principles and applications. In *Animal Biotechnology* (pp. 211-231).  
694 Elsevier. <https://doi.org/https://doi.org/10.1016/B978-0-12-416002-6.00012-2>
- 695 Verma, A., Verma, M., & Singh, A. (2020). Animal tissue culture principles and applications. *Animal*  
696 *Biotechnology*, 269-293. <https://doi.org/10.1016/B978-0-12-811710-1.00012-4>
- 697 Wang, W., & El-Deiry, W. S. (2003). Bioluminescent molecular imaging of endogenous and exogenous p53-  
698 mediated transcription in vitro and in vivo using an HCT116 human colon carcinoma xenograft model.  
699 *Cancer biology & therapy*, 2(2), 196-202. <https://doi.org/10.4161/cbt.2.2.347>
- 700 Weber, C. K., Liptay, S., Wirth, T., Adler, G., & Schmid, R. M. (2000). Suppression of NF- $\kappa$ B activity by  
701 sulfasalazine is mediated by direct inhibition of I $\kappa$ B kinases  $\alpha$  and  $\beta$ . *Gastroenterology*, 119(5), 1209-  
702 1218. <https://doi.org/10.1053/gast.2000.19458>
- 703 Westerlund-Karlsson, A., Saviranta, P., & Karp, M. (2002). Generation of thermostable monomeric luciferases  
704 from *Photobacterium luminescens*. *Biochemical and biophysical research communications*, 296(5), 1072-  
705 1076. [https://doi.org/10.1016/s0006-291x\(02\)02052-1](https://doi.org/10.1016/s0006-291x(02)02052-1)
- 706 WorldHealthOrganization. (2021). *Noncommunicable diseases*. Retrieved June, 04 from  
707 <https://www.who.int/news-room/fact-sheets/detail/noncommunicable-diseases>
- 708 Wunsch, A., Ahda, Y., Banaz-Yaşar, F., Sonntag, B., Nieschlag, E., Simoni, M., & Gromoll, J. (2005). Single-  
709 nucleotide polymorphisms in the promoter region influence the expression of the human follicle-  
710 stimulating hormone receptor. *Fertility and sterility*, 84(2), 446-453.  
711 <https://doi.org/10.4161/cbt.2.2.347>
- 712 Xu, T., Close, D. M., Webb, J. D., Price, S. L., Ripp, S. A., & Sayler, G. S. (2013, May 29). Continuous, real-  
713 time bioimaging of chemical bioavailability and toxicology using autonomously bioluminescent human  
714 cell lines. *Proc SPIE Int Soc Opt Eng*, 8723, 872310. <https://doi.org/10.1117/12.2015030>
- 715 Xu, T., Close, D. M., Webb, J. D., Ripp, S. A., & Sayler, G. S. (2013). Autonomously bioluminescent  
716 mammalian cells for continuous and real-time monitoring of cytotoxicity. *JoVE (Journal of Visualized*  
717 *Experiments)*(80), e50972. <https://doi.org/10.3791/50972>
- 718 Xu, T., Marr, E., Lam, H., Ripp, S., Sayler, G., & Close, D. (2015). Real-time toxicity and metabolic activity  
719 tracking of human cells exposed to *Escherichia coli* O157: H7 in a mixed consortia. *Ecotoxicology*,  
720 24(10), 2133-2140. <https://doi.org/10.1007/s10646-015-1552-3>
- 721 Xu, T., Ripp, S., Sayler, G. S., & Close, D. M. (2014). Expression of a humanized viral 2A-mediated lux operon  
722 efficiently generates autonomous bioluminescence in human cells. *PLoS one*, 9(5), e96347.  
723 <https://doi.org/https://doi.org/10.1371/journal.pone.0096347>



724 Zhao, H., Doyle, T. C., Wong, R. J., Cao, Y., Stevenson, D. K., Piwnica-Worms, D., & Contag, C. H. (2004).  
725 Characterization of coelenterazine analogs for measurements of Renilla luciferase activity in live cells  
726 and living animals. *Molecular Imaging*, 3(1), 43-54. <https://doi.org/10.1162/153535004773861714>

727

728

729

730

731

732

733

734

735

736

737

738

739

740

741

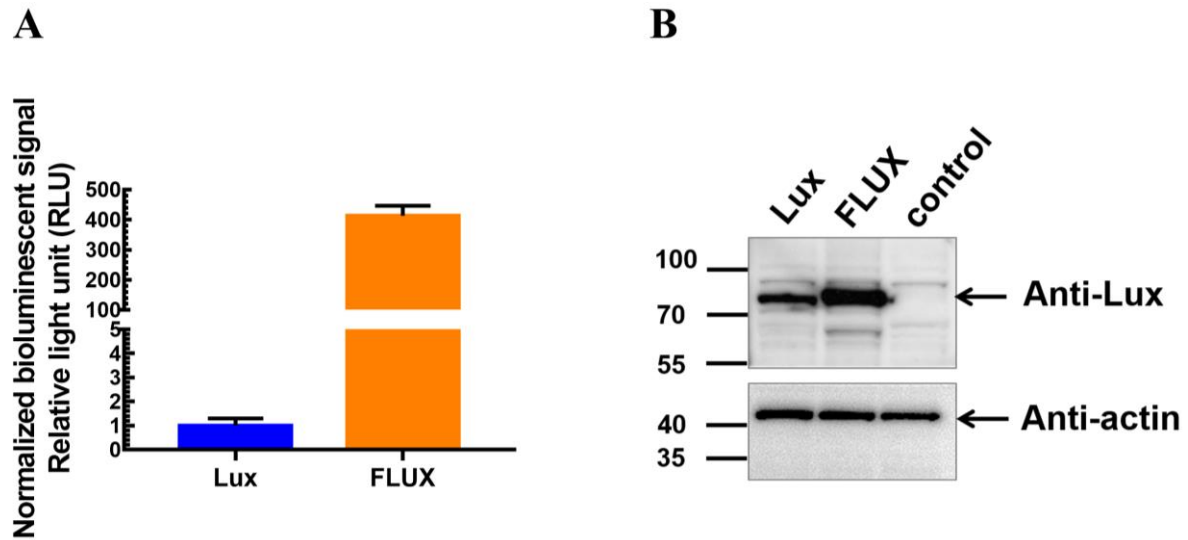

742

743 **Figure 1.** Expression of the original fusion bacterial luciferase gene (*lux*) and codon optimized (*FLUX*) in HEK293T cells. Vectors of pGL3 [*lux*/SV40]  
744 or pGL3[*FLUX*/SV40] (0.07 pmol each) and 0.007 pmol of pRL-TK vector (internal control) were co-transfected into HEK293T cells. After 48 hours,  
745 of transfection, cells were collected, and Lux Lysis Reagent (LLR) was added, and the protein expression and luciferase activity were measured. **A.** The  
746 activity of Lux was monitored by adding a solution (100  $\mu$ L) of reagent cocktail consisting of 5  $\mu$ M FMN, 100  $\mu$ M HPA, 10  $\mu$ M decanal and 100  $\mu$ M  
747 NADH into a solution of cell lysate that was freshly mixed with 50 mU of reductase C<sub>1</sub>. The luminescence signal was monitored for 10 sec with a 2-sec  
748 delay using an AB-2250 single tube luminometer (ATTO Corporation, Japan). The *Rluc* activity was measured using the *Renilla* luciferase assay reagent  
749 [E2810, Promega Corporation) according to the manufacturer's instructions. The Lux activity was normalized with the Rluc activity and reported as  
750 normalized bioluminescence signals by comparing the fold change in activities. Error bars indicate the standard deviation (n = 4). **B.** Expression level of  
751 each Lux was measured using western blot analysis with anti-flux antibody for detection of Lux protein overexpressed in cells containing the Lux  
752 (pGL3[*lux*/SV40]) and FLUX (pGL3[*FLUX*/SV40]). The control sample was lysate from cells without any transfection. Anti-actin was used for detection  
753 of actin as a housekeeping gene for normalizing the signals. Signal detection was carried out using secondary staining with HRP-conjugation and  
754 chemiluminescent reagents for HRP (EzWestLumi plus, ATTO Cooperation, Japan). The luminescence from HRP activity was imaged on a WSE-6100  
755 LuminoGraph I Gel documentation system.

756

757

758

759

760

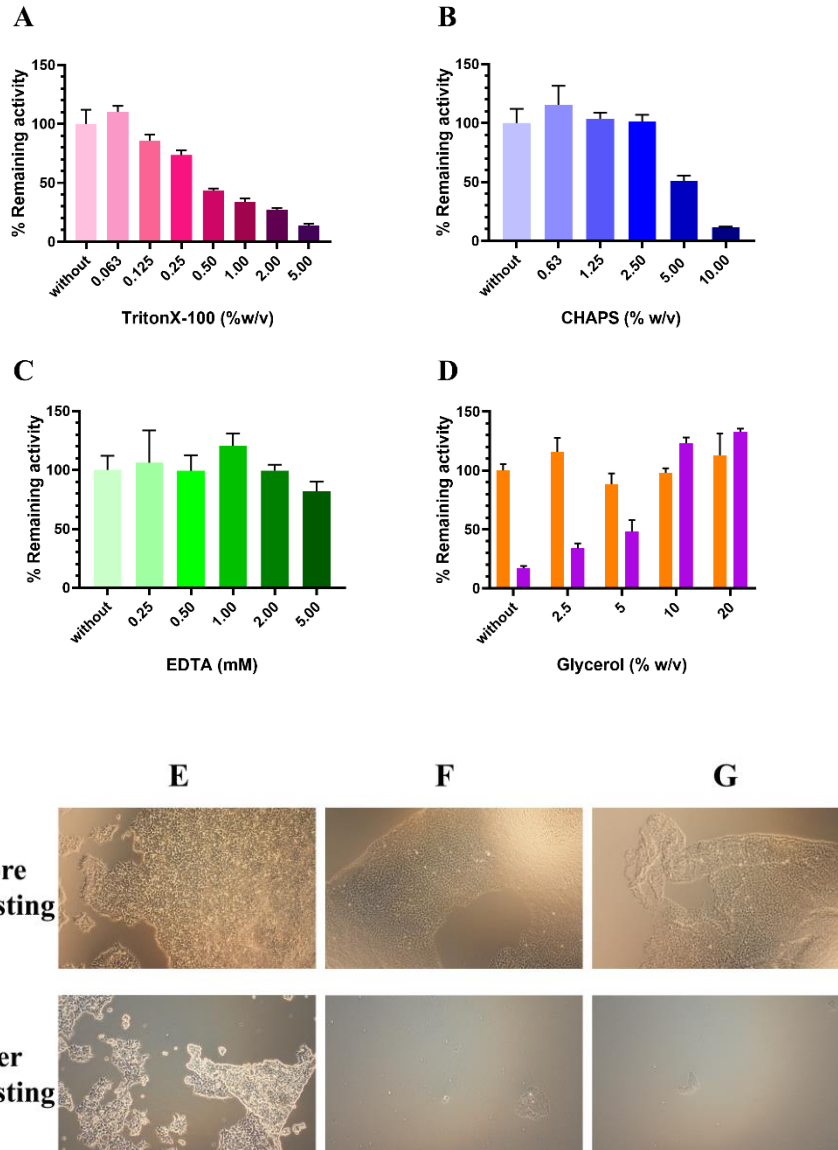

761

762

763 **Figure 2** Effects of various additive compounds on the purified Lux activity. **A**. Triton-X100, **B**. CHAPS, **C**. EDTA, and **D**. Glycerol before (orange)  
 764 and after three freeze-thaw cycles (purple). Efficiency comparison of cell harvesting using different lysis reagents including **E**. (50 mM sodium phosphate  
 765 buffer pH 7.0), **F**. (Lux Lysis Reagent (LLR), this study) and **G**. Cell Culture Lysis Reagent (CCLR, Promega). **A-D**, The effects of each additive on Lux  
 766 activity was investigated by pre-mixing the purified Lux solution with each additive at various concentrations and incubating for 15 min before measuring  
 767 Lux activity compared to purified Lux. The activity of Lux was monitored by adding a solution (100  $\mu$ L) of assay cocktail consisting of 5  $\mu$ M FMN, 100  
 768  $\mu$ M HPA, 10  $\mu$ M decanal and 100  $\mu$ M NADH into a solution of cell lysate that was freshly mixed with 50 mU of reductase C1. The luminescence signal  
 769 was monitored for 10 sec with a 2-sec delay using an AB-2250 single tube luminometer (ATTO Corporation, Japan). Each Lux activity was divided by  
 770 the Lux activity measured in the absence of any additive compounds to obtain a remaining activity. The remaining activity was multiplied by 100 to  
 771 obtain %remaining activity. Error bars indicate standard deviations (n = 4). Effects of various lysis reagents on cell detachment were investigated by  
 772 plating  $1 \times 10^5$  HEK293T cells on a 24-well plate for 24 hours before adding 100  $\mu$ L of lysis reagent and then monitoring HEK293T cell morphology using  
 773 an IX73 inverted light microscope (Olympus). Cells were incubated at room temperature with rocking for 15 min before collecting the detached cells  
 774 and the remaining HEK293T cells on the culture plate were examined using the IX73 inverted light microscope (Olympus).

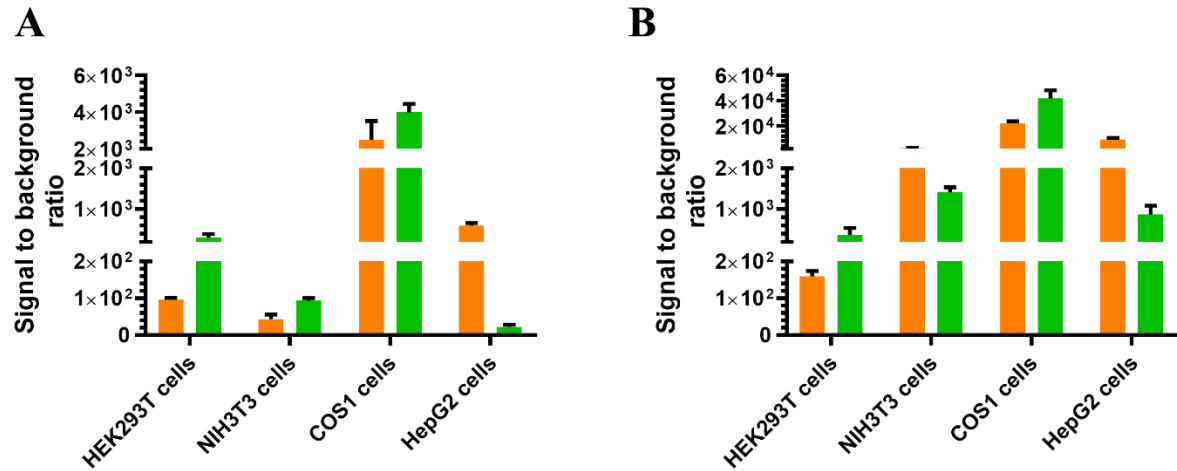

775

776 **Figure 3.** Comparison of signal to background ratios of FLUX (orange) and Fluc (green) gene reporter systems **A.** Systems constructed in the pGL3  
777 backbone vector and **B.** Systems constructed in the pGL4 backbone vector. Various cell types including HEK293T, NIH3T3, COS1, and HepG2 cells  
778 were used for testing bioluminescence signals. HEK293T, NIH3T3, COS1, and HepG2 cells were co-transfected with each reporter gene (0.07 pmol) and  
779 the internal control pRL-TK vector (0.007 pmol). Cells were collected at 48-hours after transfection by washing the culture with Passive Lysis Buffer or  
780 Lux Lysis Reagent (LLR). Then, luciferase activity was measured by adding a 100  $\mu$ L of assay cocktail consisting of 5  $\mu$ M FMN, 100  $\mu$ M HPA, 10  $\mu$ M  
781 decanal and 100  $\mu$ M NADH into a solution of cell lysate that freshly mixed with 50 mU of reductase C<sub>1</sub>. The luminescence signal was monitored for 10  
782 sec with a 2-sec delay using an AB-2250 single tube luminometer (ATTO Corporation, Japan). The Fluc and Rluc activities were measured using firefly  
783 luciferase and *Renilla* Luciferase Assay reagents, respectively [E1500 and E2810, Promega Corporation) according to the manufacturer's instructions.  
784 The luciferase activity under the constitutive SV40 promoter was divided by their Rluc activity to obtain the normalized luciferase activity. The normalized  
785 signal of SV40 promoter vector was divided by the normalized signal from the corresponding promoterless vector to obtain a value of signal to background  
786 ratio. Error bars indicate the standard deviation values from experiments with n = 4.

787

788

789

790

791

792

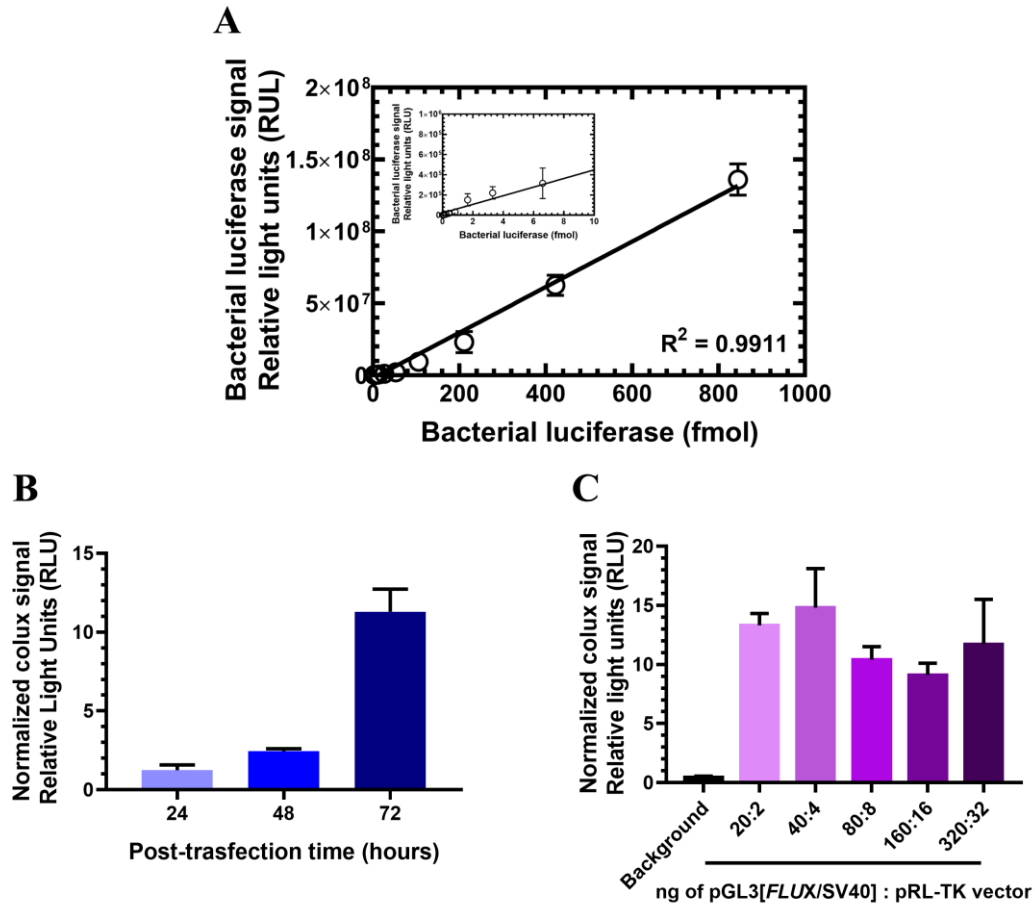

793

794 **Figure 4.** FLUX signals and their influencing factors. **A.** A correlation of responsive signals and the amount of purified recombinant Lux. 2-Fold dilutions  
795 of Lux were made from 850 fmoles to 25 amoles for determining a correlation between Lux signal at various amount of the enzyme. The correlation of  
796 responsive signals with amount of Lux was plotted and shown in the insert figure. The coefficient of determination ( $R^2$ ) was analyzed by GraphPad Prism  
797 Version 8 software shown in the figure. **B.** Effects of a post-transfection period on FLUX signals. HEK293T cells were transfected with the pGL3  
798 [FLUX/SV40] vector (0.07 pmol) and 0.007 pmol of the internal control pRL-TK vector. Cells were collected at 24-, 48-, and 72-hours post-transfection  
799 using Lux Lysis Reagent (LLR) and the resulting luciferase activities were independently measured. **C.** Normalized FLUX signals at various amounts of  
800 FLUX vector. A pGL3[FLUX/SV40] vector was co-transfected with pRL-TK vector as internal control vector at target:control vector amount of 20:2,  
801 40:4, 80:8, 160:16, and 320:32 ng into HEK293T cells. The activity of Lux was monitored by adding a 100  $\mu$ L of assay cocktail consisting of 5  $\mu$ M FMN,  
802 100  $\mu$ M HPA, 10  $\mu$ M decanal, and 100  $\mu$ M NADH into a solution of cell lysate that was freshly mixed with 50 mU of reductase  $C_1$ . The luminescence  
803 signal was monitored for 10 sec with a 2-sec delay using an AB-2250 single tube luminometer (ATTO Corporation, Japan). The Rluc activity was  
804 measured using *Renilla* Luciferase Assay Reagent [E2810, Promega Corporation] according to the manufacturer's instructions. The FLUX activity was  
805 divided by their Rluc luciferase activity to obtain normalized luciferase signals. Error bars indicate the standard deviation values ( $n = 4$ ).

806

807

808

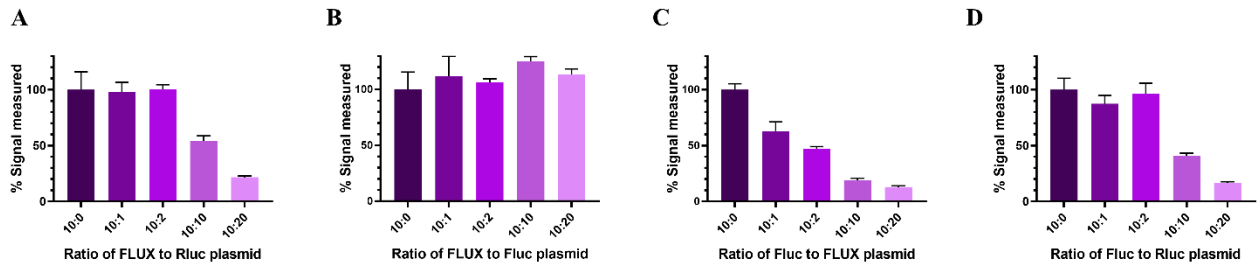

809

810 **Figure 5.** Signals of the target luciferase measured at various ratios of target:control vectors. Three types of luciferase vectors including,  
811 pGL3[luc+/SV40] vector, pGL3 [FLUX/SV40] and pRL-TK vectors were used as either target vector or control vector for exploring the four combination  
812 target/control vector sets including **A.** FLUX/Rluc, **B.** FLUX/Fluc, **C.** Fluc/FLUX, and **D.** Fluc/RLuc. Constant amounts of target vectors (0.07 pmol)  
813 was co-transfected into HEK293T cells with varying amounts of control vector at ratios of 10:0, 10:1, 10:2, 10:10, and 10:20. Cells were collected at 48-  
814 hours post-transfection and lysed in Passive Lysis Buffer or Lux Lysis Reagent (LLR) and luciferase activity was independently measured. The activity  
815 of FLUX was monitored by adding 100  $\mu$ L of an assay reagent cocktail consisting of 5  $\mu$ M FMN, 100  $\mu$ M HPA, 10  $\mu$ M decanal, and 100  $\mu$ M NADH  
816 into a solution of cell lysate freshly mixed with 50 mU of reductase C<sub>1</sub>. The luminescence signal was monitored for 10 sec with a 2-sec delay using an  
817 AB-2250 single tube luminometer (ATTO Corporation, Japan). The Fluc and Rluc activities were measured using Firefly Luciferase Assay Reagent  
818 (E1500, Promega Corporation) and *Renilla* Luciferase Assay Reagent [E2810, Promega Corporation], respectively according to the manufacturer's  
819 instructions. Percentage of signals measured (% signal measured) was calculated by dividing the signals of the target luciferase with the signals obtained  
820 in the absence of control vector (designated as 10:0 ratio) and then multiplied by 100. Error bars indicate the standard deviation (n = 4).

821

822

823

824

825

826

827

828

829

830

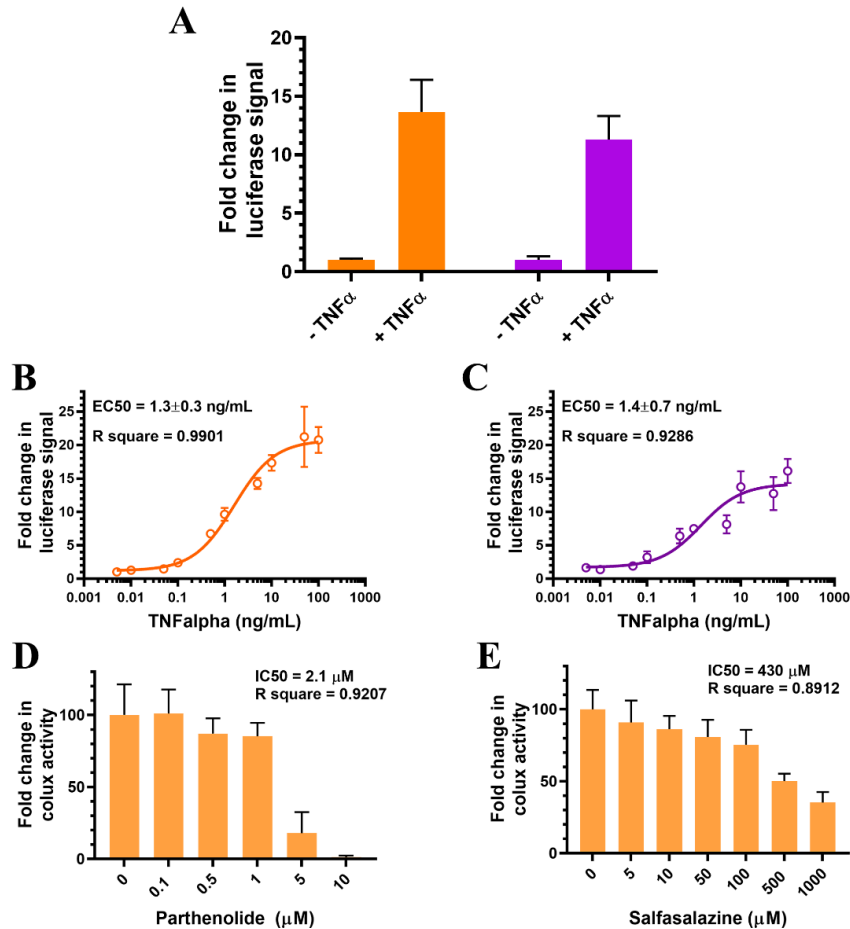

831

832 **Figure 6** Screening of inhibitors of the NF- $\kappa$ B cell signaling pathway using two combined luciferase-reporter gene assays. **A** Comparison of sensitivity  
 833 response of two combined luciferase-reporter gene assays including 1. FLUX/Fluc (orange) and 2. Fluc/Rluc (purple). Each combination including pGL3-  
 834 NF- $\kappa$ B[*FLUX*/TK] vector with pGL3 [*luc*<sup>+</sup>/SV40] vector (orange) and pGL3-NF- $\kappa$ B[*luc*<sup>+</sup>/TK] vector with pRL-TK vector (purple) were transfected into  
 835 HEK293T cells. At 24 hours after transfection, the old medium was changed to fresh medium either with 10 ng/mL of TNF $\alpha$  (+TNF $\alpha$ ) or without TNF $\alpha$   
 836 (-TNF $\alpha$ ) for 6 hours. Cells were collected and lysed in either Passive Lysis Buffer or Lux Lysis Reagent (LLR). The luciferase activity was then measured.  
 837 Error bars indicate the standard deviation (n = 4). **B and C** Investigation of TNF $\alpha$  dose-response of **B**. FLUX/Fluc and **C**. Fluc/Rluc combinations.  
 838 Experiments were carried out by transfecting HEK293T cells that were seeded in a 6-well plate for 1-day with 1. pGL3-NF $\kappa$ B[*FLUX*/TK] with pGL3  
 839 [*luc*<sup>+</sup>/SV40] and 2. pGL3-NF- $\kappa$ B[*luc*<sup>+</sup>/TK] with pRL-TK vectors. After 12-hours of transfection, transfected cells were washed, trypsinized and seeded  
 840 onto a 96-well plate. Seeded cells were further incubated for 24 hours. Then, the old medium was changed to a new medium supplied with various TNF $\alpha$   
 841 activators for 6 hours. Cells were collected and lysed in either Passive Lysis Buffer or Lux Lysis Reagent (LLR) and their luciferase activities were  
 842 measured. **D and E** NF- $\kappa$ B inhibitor screening using the new combined FLUX/Fluc reporter gene assay. The pGL3-NF- $\kappa$ B[*FLUX*/TK] and pGL3  
 843 [*luc*<sup>+</sup>/SV40] vectors were transfected into HEK293T cells that were seeded in a 6-well plates for a 1-day period. After 12 hours of transfection, transfected  
 844 cells were washed, trypsinized and seeded onto a 96-well plate culture plate and further incubated for 24 hours. The medium was then changed to fresh  
 845 medium supplied with various concentrations of inhibitor for 30 min before activating the system by adding 10 ng/mL of TNF $\alpha$  for 6 hours. The cells  
 846 were collected and lysed in either Passive Lysis Buffer or Lux Lysis Reagent (LLR), and their luciferase activities were measured. The activity of Lux  
 847 was monitored by adding 100  $\mu$ L of a reagent cocktail consisting of 5  $\mu$ M FMN, 100  $\mu$ M HPA, 10  $\mu$ M decanal, and 100  $\mu$ M NADH into cell lysate  
 848 freshly mixed with 50 mU of C<sub>1</sub> reductase. The luminescence signal was monitored for 10 sec with a 2-sec delay using an AB-2250 single tube

849 luminometer (ATTO Corporation, Japan). The Fluc and Rlucactivities were measured using firefly luciferase and Renilla Luciferase Assay Reagents,  
850 E1500 and E2810, respectively [Promega Corporation] according to the manufacturer's instructions. Error bars indicate the standard deviation (n = 4).
